# Supplementary material
Source: PubMed Central journal article supplement (PMC4249126)
Supplement: JVI.02320-14_zjv999099805so1.pdf [file JVI.02320-14_zjv999099805so1.pdf]

# **Drosophila C virus systemic infection leads to intestinal obstruction**

By S. Chtarbanova et al

## **SUPPLEMENTAL DATA**

**Table S1.** List of genes repressed by virus infection

**Table S2.** List of tissue specific genes repressed by DCV infection

**Table S1.** List of genes repressed by virus infection.

| Probe number                    | Flybase ID  | Gene name       | Synonymus                                  | GO_MOLECULAR_FUNCTION                                                      | GO         | DCV24/Tris24 | DCV48/Tris48 | FHV48/Tris48 | FHV72/Tris48 | SDV4d/Tris48 | SDV8d/Tris48 |
|---------------------------------|-------------|-----------------|--------------------------------------------|----------------------------------------------------------------------------|------------|--------------|--------------|--------------|--------------|--------------|--------------|
| <b>Common DCV, FHV and SINV</b> |             |                 |                                            |                                                                            |            |              |              |              |              |              |              |
| 152766_at                       | FBgn0002563 | Lsp1beta        | Larval serum protein 1 beta                | nutrient reservoir activity                                                | GO:0045735 | 0,0          | 0,3          | 0,2          | 0,3          | 0,3          | 0,2          |
| 143944_at                       | FBgn0020906 | Ser4            | Jonah 25Bi                                 | endopeptidase activity                                                     | GO:0004175 | 0,0          | 0,1          | 0,2          | 0,1          | 0,8          | 0,3          |
| 152265_at                       | FBgn0039313 | CG11892         | -                                          | transferase activity, transferring phosphorus-containing groups            | GO:0016772 | 0,0          | 0,1          | 0,7          | 0,4          | 0,6          | 0,4          |
| 148332_at                       | FBgn0035779 | CG8562          | -                                          | metallocarboxypeptidase activity                                           | GO:0004181 | 0,0          | 0,2          | 0,4          | 0,2          | 0,7          | 0,4          |
| 146461_at                       | FBgn0032726 | CG10621         | -                                          | selenocysteine methyltransferase activity                                  | GO:0016205 | 0,1          | 0,4          | 0,5          | 0,3          | 0,7          | 0,4          |
| 146830_s_at                     | FBgn0043576 | PGRP-SC1a       | PGRP-SC1a                                  | peptidoglycan binding                                                      | GO:0042834 | 0,1          | 0,1          | 0,2          | 0,2          | 0,2          | 0,2          |
| 152552_at                       | FBgn0039423 | CG31085         | -                                          | ATP binding                                                                | GO:0005524 | 0,2          | 0,4          | 0,4          | 0,4          | 0,5          | 0,4          |
| 148639_at                       | FBgn0036262 | CG6910          | -                                          | inositol oxygenase activity                                                | GO:0050113 | 0,2          | 0,5          | 0,3          | 0,4          | 0,6          | 0,4          |
| 150586_at                       | FBgn0039324 | CG10553         | -                                          | transferase activity, transferring phosphorus-containing groups            | GO:0016772 | 0,2          | 0,3          | 0,4          | 0,5          | 0,5          | 0,4          |
| 150884_at                       | FBgn0039761 | CG18404         | -                                          | -                                                                          |            | 0,3          | 0,5          | 0,3          | 0,3          | 0,5          | 0,5          |
| 143603_i_at                     | FBgn0010359 | gammaTry        | gammaTrypsin                               | serine-type endopeptidase activity                                         | GO:0004252 | 0,3          | 0,4          | 0,2          | 0,3          | 0,4          | 0,4          |
| 145979_at                       | FBgn0031942 | CG7203          | -                                          | -                                                                          |            | 0,3          | 0,5          | 0,4          | 0,2          | 0,8          | 0,5          |
| 150257_at                       | FBgn0038790 | CG5097          | Metallothionein C                          | metal ion binding                                                          | GO:0046872 | 0,4          | 0,3          | 0,6          | 0,4          | 0,5          | 0,6          |
| <b>Common DCV and FHV</b>       |             |                 |                                            |                                                                            |            |              |              |              |              |              |              |
| 145795_at                       | FBgn0031653 | CG8871          | Jonah 25Biii                               | endopeptidase activity                                                     | GO:0004175 | 0,0          | 0,2          | 0,4          | 0,4          | 0,9          | 0,8          |
| 143341_at                       | FBgn0003358 | Ser99Dc         | Jonah 99Ci                                 | serine-type endopeptidase activity                                         | GO:0004252 | 0,0          | 0,2          | 0,5          | 0,4          | 0,9          | 0,7          |
| 141418_at                       | FBgn0036024 | CG18180         | -                                          | serine-type endopeptidase activity                                         | GO:0004252 | 0,0          | 0,2          | 0,2          | 0,4          | 0,8          | 0,6          |
| 145796_at                       | FBgn0031654 | CG8869          | Jonah 25Bii                                | serine-type endopeptidase activity                                         | GO:0004252 | 0,0          | 0,1          | 0,2          | 0,3          | 1,2          | 0,7          |
| 146569_at                       | FBgn0032913 | CG9259          | -                                          | transferase activity, transferring phosphorus-containing groups            | GO:0016772 | 0,1          | 0,2          | 0,9          | 0,5          | 0,8          | 0,6          |
| 146323_at                       | FBgn0032494 | CG5945          | -                                          | -                                                                          |            | 0,1          | 0,2          | 0,4          | 0,4          | 0,6          | 0,5          |
| 147118_at                       | FBgn0033774 | CG12374         | -                                          | metallocarboxypeptidase activity                                           | GO:0004181 | 0,1          | 0,3          | 1,0          | 0,3          | 1,3          | 0,8          |
| 148964_at                       | FBgn0036738 | CG7542          | -                                          | serine-type endopeptidase activity                                         | GO:0004252 | 0,1          | 0,3          | 0,2          | 0,3          | 0,8          | 0,8          |
| 154890_at                       | FBgn0036289 | CG10657         | -                                          | retinal binding                                                            | GO:0016918 | 0,1          | 0,1          | 0,4          | 0,5          | 0,7          | 0,5          |
| 146103_at                       | FBgn0032144 | CG17633         | -                                          | metallocarboxypeptidase activity                                           | GO:0004181 | 0,1          | 0,4          | 0,8          | 0,5          | 1,2          | 1,0          |
| 148255_at                       | FBgn0035667 | CG10475         | Jonah 65Ai                                 | serine-type endopeptidase activity                                         | GO:0004252 | 0,1          | 0,3          | 0,5          | 0,4          | 0,8          | 0,7          |
| 150576_at                       | FBgn0039312 | CG10514         | -                                          | transferase activity, transferring phosphorus-containing groups            | GO:0016772 | 0,1          | 0,2          | 0,6          | 0,4          | 0,7          | 0,5          |
| 146832_at                       | FBgn0043575 | PGRP-SC2        | PGRP-SC2                                   | peptidoglycan binding                                                      | GO:0042834 | 0,1          | 0,4          | 0,6          | 0,5          | 0,9          | 0,8          |
| 149196_at                       | FBgn0037111 | BcDNA:GH08902   | -                                          | aldose 1-epimerase activity                                                | GO:0004034 | 0,1          | 0,4          | 0,6          | 0,4          | 0,7          | 0,6          |
| 150274_at                       | FBgn0038820 | CG4000          | -                                          | -                                                                          |            | 0,1          | 0,3          | 0,6          | 0,4          | 1,0          | 0,8          |
| 143467_f_at                     | FBgn0004428 | LysE            | Lysozyme E                                 | lysozyme activity                                                          | GO:0003796 | 0,2          | 0,3          | 0,5          | 0,5          | 0,7          | 0,6          |
| 144310_at                       | FBgn0028920 | BG:DS00941.12   | -                                          | molecular_function                                                         | GO:0003674 | 0,2          | 0,3          | 0,5          | 0,6          | 0,7          | 0,6          |
| 152794_at                       | FBgn0035781 | CG8560          | -                                          | carboxypeptidase activity                                                  | GO:0004180 | 0,2          | 0,3          | 0,6          | 0,4          | 0,7          | 0,7          |
| 143624_at                       | FBgn0010425 | epsilonTry      | epsilonTrypsin                             | serine-type endopeptidase activity                                         | GO:0004252 | 0,2          | 0,5          | 0,3          | 0,3          | 0,7          | 0,5          |
| 151422_at                       | FBgn0040959 | Peritrophin-15a | Peritrophin-15a                            | chitin binding                                                             | GO:0008061 | 0,2          | 0,7          | 0,4          | 0,4          | 0,7          | 0,6          |
| 147516_at                       | FBgn0034470 | Obp56d          | Odorant-binding protein 56d                | odorant binding                                                            | GO:0005549 | 0,2          | 0,6          | 0,5          | 0,6          | 0,7          | 0,7          |
| 146166_at                       | FBgn0032265 | CG18301         | -                                          | hydrolase activity, acting on ester bonds                                  | GO:0016788 | 0,2          | 0,4          | 0,6          | 0,4          | 0,8          | 0,6          |
| 153029_at                       | FBgn0005633 | fln             | flightin                                   | -                                                                          |            | 0,2          | 0,5          | 0,5          | 0,3          | 0,8          | 0,5          |
| 154244_at                       | FBgn0001091 | Gapdh1          | Glyceraldehyde 3 phosphate dehydrogenase 1 | glyceraldehyde-3-phosphate dehydrogenase (NAD+) (phosphorylating) activity | GO:0004365 | 0,3          | 0,6          | 0,8          | 0,5          | 1,2          | 1,0          |
| 142583_at                       | FBgn0034497 | CG9090          | -                                          | phosphate ion transmembrane transporter activity                           | GO:0015114 | 0,3          | 0,7          | 0,7          | 0,4          | 1,1          | 0,8          |
| 146555_at                       | FBgn0032892 | Spn3            | Serpin 38F                                 | serine-type endopeptidase inhibitor activity                               | GO:0004867 | 0,3          | 0,6          | 0,5          | 0,4          | 0,6          | 0,5          |
| 143060_f_at                     | FBgn0000045 | Act79B          | Actin 79B                                  | structural constituent of cytoskeleton                                     | GO:0005200 | 0,3          | 0,9          | 0,6          | 0,3          | 0,9          | 0,7          |
| 145955_at                       | FBgn0031912 | CG5261          | -                                          | dihydrolipoyllysine-residue acetyltransferase activity                     | GO:0004742 | 0,3          | 0,7          | 0,8          | 0,5          | 1,0          | 0,7          |
| 147144_at                       | FBgn0033826 | CG4734          | -                                          | -                                                                          |            | 0,4          | 0,5          | 0,4          | 0,4          | 0,8          | 0,5          |

|           |             |         |                                              |                                                               |            |     |     |     |     |     |     |
|-----------|-------------|---------|----------------------------------------------|---------------------------------------------------------------|------------|-----|-----|-----|-----|-----|-----|
| 150784_at | FBgn0039598 | CG14061 | aquarius                                     | serine-type endopeptidase activity                            | GO:0004252 | 0,4 | 0,6 | 0,7 | 0,5 | 0,9 | 0,6 |
| 153932_at | FBgn0031908 | CG5177  | -                                            | trehalose-phosphatase activity                                | GO:0004805 | 0,4 | 0,8 | 0,6 | 0,4 | 0,8 | 0,6 |
| 142498_at | FBgn0039830 | CG1746  | -                                            | hydrogen-exporting ATPase activity, phosphorylative mechanism | GO:0008553 | 0,4 | 0,8 | 0,7 | 0,5 | 0,7 | 0,7 |
| 153082_at | FBgn0035542 | CG11347 | -                                            | steroid hormone receptor binding                              | GO:0035258 | 0,4 | 0,8 | 0,5 | 0,5 | 0,6 | 0,6 |
| 145177_at | FBgn0030733 | CG3560  | -                                            | ubiquinol-cytochrome-c reductase activity                     | GO:0008121 | 0,4 | 0,3 | 0,5 | 0,4 | 0,7 | 0,5 |
| 141226_at | FBgn0038293 | CG6904  | Glycogen synthase                            | glycogen (starch) synthase activity                           | GO:0004373 | 0,4 | 0,6 | 0,5 | 0,4 | 0,7 | 0,5 |
| 153531_at | FBgn0000044 | Act57B  | Actin 57B                                    | structural constituent of cytoskeleton                        | GO:0005200 | 0,4 | 0,9 | 0,6 | 0,5 | 0,8 | 0,8 |
| 143263_at | FBgn0002741 | Mhc     | Myosin heavy chain                           | ATP binding                                                   | GO:0005524 | 0,4 | 0,8 | 0,5 | 0,4 | 0,6 | 0,6 |
| 143264_at | FBgn0002772 | Mlc1    | Myosin alkali light chain 1                  | microfilament motor activity                                  | GO:0000146 | 0,4 | 0,9 | 0,7 | 0,5 | 1,0 | 0,8 |
| 141748_at | FBgn0035927 | CG32030 | Formin homology 2 domain containing ortholog | actin binding                                                 | GO:0003779 | 0,4 | 0,7 | 0,6 | 0,4 | 0,8 | 0,6 |
| 154816_at | FBgn0000667 | Actn    | alpha actinin                                | actin filament binding                                        | GO:0051015 | 0,5 | 0,7 | 0,5 | 0,4 | 0,6 | 0,5 |
| 143930_at | FBgn0020509 | Acp62F  | Accessory gland protein 62F                  | serine-type endopeptidase inhibitor activity                  | GO:0004867 | 0,5 | 0,7 | 0,7 | 0,5 | 0,8 | 0,6 |
| 143826_at | FBgn0015585 | Acp63F  | Accessory gland protein 63F                  | molecular_function                                            | GO:0003674 | 0,5 | 0,7 | 0,5 | 0,4 | 0,7 | 0,6 |
| 153115_at | FBgn0037891 | CG5214  | -                                            | dihydropyridyllysine-residue succinyltransferase activity     | GO:0004149 | 0,5 | 0,7 | 0,5 | 0,5 | 0,7 | 0,5 |

#### Common DCV and SINV

|           |             |               |                                           |                                            |            |     |     |     |     |     |     |
|-----------|-------------|---------------|-------------------------------------------|--------------------------------------------|------------|-----|-----|-----|-----|-----|-----|
| 152126_at | FBgn0027571 | BcDNA:GH07626 | -                                         | fatty acid synthase activity               | GO:0004312 | 0,1 | 0,5 | 0,5 | 0,7 | 0,6 | 0,4 |
| 152059_at | FBgn0027580 | BcDNA:GH06348 | -                                         | pyruvate carboxylase activity              | GO:0004736 | 0,2 | 0,4 | 0,6 | 0,5 | 0,8 | 0,5 |
| 141619_at | FBgn0032263 | Fatp          | Fatty acid (long chain) transport protein | long-chain fatty acid transporter activity | GO:0005324 | 0,3 | 0,4 | 0,6 | 0,7 | 0,5 | 0,5 |
| 152911_at | FBgn0017619 | desat1        | desat1                                    | stearoyl-CoA 9-desaturase activity         | GO:0004768 | 0,3 | 0,9 | 0,7 | 0,6 | 0,7 | 0,4 |
| 152934_at | FBgn0023520 | EG:39E1.3     | -                                         | GTP binding                                | GO:0005525 | 0,4 | 0,8 | 0,6 | 1,1 | 0,4 | 0,5 |

#### Common FHV and SINV

|             |             |             |                               |                                              |            |     |     |     |     |     |     |
|-------------|-------------|-------------|-------------------------------|----------------------------------------------|------------|-----|-----|-----|-----|-----|-----|
| 143609_at   | FBgn0010388 | Dro         | Drosocin                      | -                                            |            | 0,6 | 1,2 | 0,1 | 0,6 | 1,2 | 0,4 |
| 144907_at   | FBgn0030356 | CR32661     | -                             | -                                            |            | 0,8 | 0,5 | 0,3 | 0,3 | 0,3 | 0,3 |
| 151224_f_at | FBgn0040748 | CG13943     | -                             | -                                            |            | 1,0 | 0,9 | 0,3 | 0,4 | 0,4 | 0,4 |
| 153070_at   | FBgn0035961 | Tequila     | Tequila                       | serine-type endopeptidase activity           | GO:0004252 | 0,5 | 0,6 | 0,3 | 0,4 | 0,5 | 0,4 |
| 143709_at   | FBgn0013348 | TpnC41C     | Troponin C at 41C             | calcium ion binding                          | GO:0005509 | 0,7 | 1,0 | 0,3 | 0,2 | 0,5 | 0,4 |
| 143673_at   | FBgn0011670 | Mst57Dc     | Male-specific transcript 57Dc | molecular_function                           | GO:0003674 | 0,5 | 0,6 | 0,4 | 0,4 | 0,6 | 0,4 |
| 143097_f_at | FBgn0000277 | Cecropin A2 | Cecropin A2                   | -                                            |            | 1,5 | 1,6 | 0,4 | 0,7 | 0,5 | 0,5 |
| 150941_f_at | FBgn0039843 | CG15567     | -                             | -                                            |            | 0,9 | 0,9 | 0,4 | 0,4 | 0,4 | 0,4 |
| 144856_at   | FBgn0030280 | CG11106     | -                             | -                                            |            | 0,7 | 0,7 | 0,4 | 0,4 | 0,5 | 0,4 |
| 146477_at   | FBgn0032755 | CG17344     | -                             | -                                            |            | 0,9 | 0,9 | 0,4 | 0,5 | 0,4 | 0,4 |
| 143272_at   | FBgn0002855 | Acp26Aa     | Accessory gland protein 26Aa  | hormone activity                             | GO:0005179 | 0,4 | 0,5 | 0,4 | 0,3 | 0,6 | 0,5 |
| 149158_at   | FBgn0037040 | CG12983     | -                             | -                                            |            | 0,6 | 0,9 | 0,4 | 0,4 | 0,5 | 0,5 |
| 146645_at   | FBgn0033027 | CG12408     | Troponin C isoform 4          | calcium ion binding                          | GO:0005509 | 0,3 | 0,5 | 0,4 | 0,2 | 0,7 | 0,4 |
| 152562_at   | FBgn0031585 | CG2955      | -                             | structural constituent of cytoskeleton       | GO:0005200 | 0,7 | 0,8 | 0,4 | 0,4 | 0,4 | 0,4 |
| 147491_at   | FBgn0034435 | CG9975      | -                             | -                                            |            | 1,0 | 1,2 | 0,4 | 0,4 | 0,5 | 0,4 |
| 152055_at   | FBgn0035495 | CG14989     | -                             | -                                            | GO:0016491 | 0,7 | 1,0 | 0,4 | 0,5 | 0,4 | 0,5 |
| 150373_at   | FBgn0038979 | CG7046      | -                             | DNA binding                                  | GO:0003677 | 1,1 | 0,9 | 0,5 | 0,4 | 0,5 | 0,5 |
| 151563_at   | FBgn0030128 | CG34449     | -                             | zinc ion binding                             | GO:0008270 | 0,8 | 0,9 | 0,5 | 0,4 | 0,5 | 0,5 |
| 153065_at   | FBgn0028582 | lqf         | liquid facets                 | -                                            |            | 0,7 | 0,8 | 0,5 | 0,7 | 0,5 | 0,5 |
| 151171_at   | FBgn0040694 | CG14974     | -                             | molecular_function                           | GO:0003674 | 0,8 | 0,8 | 0,5 | 0,4 | 0,5 | 0,5 |
| 143274_at   | FBgn0002862 | Mst87F      | Male-specific RNA 87F         | structural molecule activity                 | GO:0005198 | 1,1 | 1,2 | 0,5 | 0,5 | 0,5 | 0,5 |
| 150904_at   | FBgn0039792 | CG2267      | -                             | -                                            |            | 0,7 | 0,8 | 0,5 | 0,4 | 0,5 | 0,5 |
| 151215_at   | FBgn0040739 | CG5119      | -                             | mRNA binding                                 | GO:0003729 | 1,0 | 1,3 | 0,5 | 0,7 | 0,5 | 0,7 |
| 144963_at   | FBgn0030422 | CG32647     | -                             | -                                            |            | 0,7 | 1,0 | 0,5 | 0,6 | 0,5 | 0,5 |
| 145689_at   | FBgn0031501 | CG17261     | -                             | -                                            |            | 0,8 | 0,9 | 0,5 | 0,4 | 0,4 | 0,5 |
| 152628_at   | FBgn0029947 | CG1999      | -                             | -                                            |            | 0,6 | 0,6 | 0,5 | 0,4 | 0,5 | 0,5 |
| 152710_at   | FBgn0033334 | CG30350     | -                             | peptidyl-prolyl cis-trans isomerase activity | GO:0003755 | 0,9 | 0,9 | 0,5 | 0,5 | 0,5 | 0,5 |
| 145438_at   | FBgn0031127 | CG1835      | -                             | -                                            |            | 0,5 | 0,6 | 0,5 | 0,5 | 0,5 | 0,4 |
| 150636_at   | FBgn0039398 | CG14540     | -                             | -                                            |            | 0,7 | 0,9 | 0,6 | 0,5 | 0,5 | 0,5 |

|           |             |         |                           |                                        |            |     |     |     |     |     |     |
|-----------|-------------|---------|---------------------------|----------------------------------------|------------|-----|-----|-----|-----|-----|-----|
| 147478_at | FBgn0034416 | CG15109 | -                         | -                                      |            | 0,6 | 0,6 | 0,6 | 0,5 | 0,5 | 0,5 |
| 143686_at | FBgn0011743 | Arp53D  | Actin-related protein 53D | structural constituent of cytoskeleton | GO:0005200 | 0,6 | 0,9 | 0,6 | 0,5 | 0,7 | 0,5 |

| DCV specific |             |                              |                                            |                                                                             |            |     |     |     |     |     |     |
|--------------|-------------|------------------------------|--------------------------------------------|-----------------------------------------------------------------------------|------------|-----|-----|-----|-----|-----|-----|
| 142147_at    | FBgn0032068 | CG9466                       | -                                          | alpha-mannosidase activity                                                  | GO:0004559 | 0,0 | 0,1 | 1,1 | 0,8 | 1,5 | 1,2 |
| 150206_at    | FBgn0038718 | CG17752                      | -                                          | secondary active organic cation transmembrane transporter activity          | GO:0008513 | 0,0 | 0,2 | 0,7 | 0,6 | 1,1 | 1,2 |
| 141450_at    | FBgn0024289 | Sodh-1                       | Sorbitol dehydrogenase 1                   | L-iditol 2-dehydrogenase activity                                           | GO:0003939 | 0,0 | 0,2 | 0,9 | 0,6 | 1,0 | 0,8 |
| 150699_at    | FBgn0039471 | CG6295                       | -                                          | phosphatidylcholine 1-acylhydrolase activity                                | GO:0008970 | 0,0 | 0,3 | 0,7 | 0,5 | 1,0 | 0,8 |
| 141426_at    | FBgn0036996 | CG5932                       | magro                                      | triglyceride lipase activity                                                | GO:0004806 | 0,0 | 0,1 | 0,9 | 0,5 | 0,8 | 0,8 |
| 143239_at    | FBgn0002565 | Lsp2                         | Larval serum protein 2                     | nutrient reservoir activity                                                 | GO:0045735 | 0,0 | 0,1 | 1,0 | 0,6 | 0,9 | 0,8 |
| 146050_at    | FBgn0032069 | CG9468                       | -                                          | alpha-mannosidase activity                                                  | GO:0004559 | 0,0 | 0,2 | 1,2 | 0,9 | 1,7 | 1,6 |
| 148360_at    | FBgn0035817 | CG7409                       | -                                          | unfolded protein binding                                                    | GO:0051082 | 0,1 | 0,3 | 0,9 | 0,5 | 1,0 | 1,0 |
| 145412_at    | FBgn0031087 | CG12656                      | -                                          | -                                                                           |            | 0,1 | 0,2 | 1,7 | 1,5 | 1,4 | 1,4 |
| 152393_at    | FBgn0030593 | CG9512                       | -                                          | choline dehydrogenase activity                                              | GO:0008812 | 0,1 | 0,2 | 1,2 | 1,0 | 1,1 | 1,1 |
| 142402_at    | FBgn0037678 | CG16749                      | -                                          | serine-type endopeptidase activity                                          | GO:0004252 | 0,1 | 0,2 | 0,7 | 0,5 | 0,9 | 0,8 |
| 149595_at    | FBgn0037765 | CG9458                       | -                                          | fatty acid elongase activity                                                | GO:0009922 | 0,1 | 0,4 | 1,3 | 1,2 | 1,4 | 1,1 |
| 148311_f_at  | FBgn0035744 | CG8628                       | -                                          | enzyme inhibitor activity                                                   | GO:0004857 | 0,1 | 0,3 | 0,6 | 0,7 | 0,9 | 0,7 |
| 150893_f_at  | FBgn0039777 | CG2229                       | Jonah 99Fii                                | endopeptidase activity                                                      | GO:0004175 | 0,1 | 0,4 | 0,9 | 0,5 | 1,2 | 1,0 |
| 152648_at    | FBgn0035090 | CG2736                       | -                                          | scavenger receptor activity                                                 | GO:0005044 | 0,1 | 0,2 | 1,4 | 1,1 | 1,3 | 1,1 |
| 151899_at    | FBgn0036992 | CG11796                      | -                                          | 4-hydroxyphenylpyruvate dioxygenase activity                                | GO:0003868 | 0,1 | 0,2 | 0,7 | 0,8 | 0,9 | 1,1 |
| 151776_at    | FBgn0037763 | CG16904                      | -                                          | fatty acid elongase activity                                                | GO:0009922 | 0,1 | 0,3 | 1,4 | 1,5 | 1,3 | 1,5 |
| 153064_at    | FBgn0032055 | CG13091                      | -                                          | fatty-acyl-CoA reductase (alcohol-forming) activity                         | GO:0080019 | 0,1 | 0,3 | 1,0 | 1,0 | 1,0 | 1,0 |
| 148422_at    | FBgn0035926 | CG5804                       | -                                          | fatty-acyl-CoA binding                                                      | GO:0000062 | 0,1 | 0,2 | 0,6 | 0,5 | 0,8 | 0,7 |
| 147422_at    | FBgn0034318 | CG14500                      | -                                          | carbohydrate binding                                                        | GO:0030246 | 0,1 | 0,3 | 0,6 | 0,6 | 1,2 | 0,8 |
| 144233_at    | FBgn0028536 | BG:DS00810.3                 | -                                          | -                                                                           |            | 0,1 | 0,5 | 1,3 | 1,0 | 1,1 | 1,0 |
| 148310_i_at  | FBgn0035744 | CG8628                       | -                                          | enzyme inhibitor activity                                                   | GO:0004857 | 0,1 | 0,3 | 0,6 | 0,6 | 0,8 | 0,7 |
| 153381_at    | FBgn0031914 | CG5973                       | -                                          | retinal binding                                                             | GO:0016918 | 0,1 | 0,2 | 0,6 | 0,7 | 0,8 | 0,6 |
| 149899_at    | FBgn0038236 | Cyp313a1                     | Cyp313a1                                   | electron carrier activity                                                   | GO:0009055 | 0,1 | 0,3 | 1,1 | 0,9 | 1,0 | 1,2 |
| 152651_at    | FBgn0039184 | CG6432                       | -                                          | acetate-CoA ligase activity                                                 | GO:0003987 | 0,1 | 0,5 | 1,2 | 1,0 | 1,2 | 0,9 |
| 142419_at    | FBgn0030098 | CG12057                      | -                                          | -                                                                           |            | 0,1 | 0,3 | 1,3 | 1,1 | 1,5 | 1,6 |
| 143338_f_at  | FBgn0003356 | Ser99Da                      | Jonah 99Cii                                | serine-type peptidase activity                                              | GO:0008236 | 0,1 | 0,6 | 1,1 | 0,7 | 1,4 | 1,3 |
| 149914_at    | FBgn0038257 | Senescence marker protein-30 | Senescence marker protein-30               | calcium ion binding                                                         | GO:0005509 | 0,1 | 0,2 | 1,9 | 1,3 | 1,6 | 1,9 |
| 143465_f_at  | FBgn0004426 | LysC                         | Lysozyme C                                 | lysozyme activity                                                           | GO:0003796 | 0,1 | 0,3 | 0,6 | 0,5 | 0,8 | 0,7 |
| 152090_at    | FBgn0032394 | CG6746                       | -                                          | -                                                                           |            | 0,1 | 0,4 | 1,1 | 1,0 | 1,2 | 1,1 |
| 143340_f_at  | FBgn0003357 | Ser99Db                      | Jonah 99Ciii                               | serine-type peptidase activity                                              | GO:0008236 | 0,1 | 0,6 | 1,0 | 0,8 | 1,4 | 1,3 |
| 143660_at    | FBgn0011555 | thetaTry                     | thetaTrypsin                               | serine-type endopeptidase activity                                          | GO:0004252 | 0,1 | 0,4 | 0,7 | 0,5 | 0,9 | 0,7 |
| 152926_at    | FBgn0040992 | CG10570                      | -                                          | -                                                                           |            | 0,1 | 0,2 | 0,6 | 0,6 | 0,7 | 0,6 |
| 144664_at    | FBgn0029975 | CG1444                       | -                                          | steroid dehydrogenase activity                                              | GO:0016229 | 0,1 | 0,4 | 1,2 | 0,9 | 1,3 | 1,3 |
| 148479_at    | FBgn0036023 | CG18179                      | -                                          | serine-type endopeptidase activity                                          | GO:0004252 | 0,1 | 0,1 | 0,1 | 0,4 | 1,1 | 0,4 |
| 153069_at    | FBgn0034394 | CG15096                      | -                                          | high affinity inorganic phosphate:sodium symporter activity                 | GO:0005316 | 0,1 | 0,3 | 1,2 | 0,8 | 1,5 | 1,2 |
| 150369_at    | FBgn0038973 | CG18594                      | Phosphatidylethanolamine-binding protein 1 | -                                                                           |            | 0,1 | 0,2 | 0,7 | 0,5 | 1,6 | 0,5 |
| 152102_at    | FBgn0035189 | CG9119                       | -                                          | hydrolase activity, acting on ester bonds                                   | GO:0016788 | 0,1 | 0,3 | 0,8 | 0,6 | 0,8 | 0,8 |
| 148254_at    | FBgn0035666 | CG6580                       | Jonah 65Aii                                | serine-type endopeptidase activity                                          | GO:0004252 | 0,1 | 0,5 | 0,6 | 0,7 | 1,1 | 1,0 |
| 145253_at    | FBgn0030859 | CG12990                      | -                                          | transferase activity, transferring acyl groups other than amino-acyl groups | GO:0016747 | 0,1 | 0,7 | 0,9 | 0,7 | 1,1 | 0,9 |
| 152407_at    | FBgn0033245 | CG11198                      | Acetyl-CoA carboxylase                     | -                                                                           |            | 0,1 | 0,3 | 0,7 | 0,8 | 0,7 | 0,7 |
| 152482_at    | FBgn0035484 | CG11594                      | -                                          | phosphotransferase activity, alcohol group as acceptor                      | GO:0016773 | 0,1 | 0,3 | 1,0 | 0,7 | 1,0 | 0,9 |
| 146619_i_at  | FBgn0032985 | CG12628                      | -                                          | -                                                                           |            | 0,1 | 0,3 | 1,6 | 1,3 | 1,5 | 1,5 |

|             |             |               |                                               |                                                                                       |            |     |     |     |     |     |     |
|-------------|-------------|---------------|-----------------------------------------------|---------------------------------------------------------------------------------------|------------|-----|-----|-----|-----|-----|-----|
| 142139_at   | FBgn0029549 | EG:BACR7A4.14 | -                                             | oxidoreductase activity, acting on CH-OH group of donors                              | GO:0016614 | 0,1 | 0,3 | 1,1 | 1,2 | 1,4 | 1,3 |
| 148265_at   | FBgn0035679 | CG10467       | -                                             | aldose 1-epimerase activity                                                           | GO:0004034 | 0,1 | 0,3 | 0,9 | 0,8 | 1,0 | 0,9 |
| 149303_at   | FBgn0037288 | CG14661       | -                                             | -                                                                                     |            | 0,1 | 0,3 | 1,0 | 1,0 | 1,3 | 1,4 |
| 142356_at   | FBgn0016724 | RfaBp         | Retinoid- and fatty acid-binding glycoprotein | lipid transporter activity                                                            | GO:0005319 | 0,1 | 0,5 | 1,6 | 1,1 | 1,2 | 0,9 |
| 151452_at   | FBgn0040993 | CG17325       | -                                             | -                                                                                     |            | 0,1 | 0,4 | 1,2 | 1,4 | 1,4 | 1,4 |
| 145637_at   | FBgn0031418 | CG3609        | -                                             | oxidoreductase activity                                                               | GO:0016491 | 0,1 | 0,3 | 0,8 | 0,6 | 0,9 | 0,8 |
| 148877_at   | FBgn0036604 | CG13061       | Neuropeptide-like precursor 3                 | neuropeptide hormone activity                                                         | GO:0005184 | 0,1 | 0,4 | 0,8 | 0,6 | 1,0 | 0,8 |
| 143466_f_at | FBgn0004427 | LysD          | Lysozyme D                                    | lysozyme activity                                                                     | GO:0003796 | 0,1 | 0,3 | 0,5 | 0,5 | 0,9 | 0,7 |
| 152369_at   | FBgn0032049 | CG13095       | beta-site APP-cleaving enzyme                 | aspartic-type endopeptidase activity                                                  | GO:0004190 | 0,1 | 0,4 | 0,8 | 0,7 | 1,0 | 0,9 |
| 147793_at   | FBgn0034885 | CG4019        | -                                             | water channel activity                                                                | GO:0015250 | 0,1 | 0,4 | 1,5 | 1,2 | 1,5 | 1,5 |
| 141406_at   | FBgn0037684 | CG8129        | -                                             | L-threonine ammonia-lyase activity                                                    | GO:0004794 | 0,1 | 0,4 | 0,5 | 0,4 | 0,4 | 0,5 |
| 148963_at   | FBgn0036737 | CG6298        | Jonah 74E                                     | serine-type endopeptidase activity                                                    | GO:0004252 | 0,1 | 0,5 | 0,9 | 0,6 | 1,2 | 1,1 |
| 144572_at   | FBgn0029838 | CG4666        | -                                             | molecular function                                                                    | GO:0003674 | 0,1 | 0,3 | 1,1 | 1,0 | 1,1 | 1,1 |
| 152568_at   | FBgn0032864 | CG2493        | -                                             | serine-type carboxypeptidase activity                                                 | GO:0004185 | 0,1 | 0,4 | 1,6 | 1,6 | 1,6 | 1,5 |
| 143243_at   | FBgn0002571 | LvpL          | Maltase A3                                    | alpha-glucosidase activity                                                            | GO:0004558 | 0,1 | 0,3 | 1,0 | 1,1 | 1,2 | 1,4 |
| 151932_at   | FBgn0000406 | Cyt-b5-r      | Cytochrome b5-related                         | electron carrier activity                                                             | GO:0009055 | 0,1 | 0,4 | 1,2 | 1,0 | 1,3 | 1,2 |
| 149116_at   | FBgn0036971 | CG6663        | -                                             | 4-aminobutyrate transaminase activity                                                 | GO:0003867 | 0,1 | 0,3 | 0,8 | 0,9 | 1,0 | 0,9 |
| 149489_at   | FBgn0037575 | CG7459        | Copper transporter 1B                         | copper uptake transmembrane transporter activity                                      | GO:0015088 | 0,2 | 0,3 | 1,8 | 1,1 | 2,4 | 2,2 |
| 151287_at   | FBgn0040813 | DIM7          | Neuropeptide-like precursor 2                 | neuropeptide hormone activity                                                         | GO:0005184 | 0,2 | 0,5 | 1,5 | 1,2 | 1,4 | 1,3 |
| 154176_at   | FBgn0034934 | Transaldolase | Tal                                           | sedoheptulose-7-phosphate-D-glyceraldehyde-3-phosphate glyceronetransferase activity  | GO:0004801 | 0,2 | 0,3 | 0,9 | 0,8 | 1,1 | 1,1 |
| 153318_at   | FBgn0027348 | bgm           | bubblegum                                     | long-chain fatty acid-CoA ligase activity                                             | GO:0004467 | 0,2 | 0,4 | 1,0 | 0,8 | 1,2 | 0,9 |
| 145178_at   | FBgn0030737 | CG9914        | -                                             | 3-hydroxyacyl-CoA dehydrogenase activity                                              | GO:0003857 | 0,2 | 0,3 | 1,3 | 0,9 | 1,5 | 1,4 |
| 149568_at   | FBgn0037714 | CG9396        | -                                             | pyruvate transmembrane transporter activity                                           | GO:0050833 | 0,2 | 0,4 | 0,7 | 0,5 | 0,9 | 0,7 |
| 146587_at   | FBgn0032947 | CG17571       | -                                             | serine-type endopeptidase activity                                                    | GO:0004252 | 0,2 | 0,4 | 0,8 | 0,6 | 1,4 | 1,1 |
| 152900_at   | FBgn0025454 | Cyp6g1        | Cyp6g1                                        | electron carrier activity                                                             | GO:0009055 | 0,2 | 0,4 | 0,8 | 0,7 | 0,7 | 0,8 |
| 152478_at   | FBgn0035087 | CG2765        | -                                             | myosin binding                                                                        | GO:0017022 | 0,2 | 0,5 | 0,9 | 0,9 | 0,9 | 0,8 |
| 153063_at   | FBgn0032713 | CG17323       | -                                             | glucuronosyltransferase activity                                                      | GO:0015020 | 0,2 | 0,4 | 1,3 | 1,0 | 1,2 | 1,3 |
| 153790_at   | FBgn0029721 | CG7010        | lethal (1) G0334                              | -                                                                                     |            | 0,2 | 0,3 | 1,0 | 0,7 | 1,1 | 0,9 |
| 150879_at   | FBgn0039755 | CG15531       | -                                             | stearoyl-CoA 9-desaturase activity                                                    | GO:0004768 | 0,2 | 0,3 | 0,6 | 1,0 | 1,2 | 1,0 |
| 147152_at   | FBgn0019928 | Ser8          | Ser8                                          | serine-type peptidase activity                                                        | GO:0008236 | 0,2 | 0,2 | 0,7 | 0,7 | 0,7 | 1,0 |
| 144306_at   | FBgn0028915 | BG:DS01068.5  | lethal (2) 34Fc                               | serine-type endopeptidase activity                                                    | GO:0004252 | 0,2 | 0,3 | 1,1 | 1,0 | 1,2 | 1,3 |
| 152151_at   | FBgn0036824 | CG3902        | -                                             | short-branched-chain-acyl-CoA dehydrogenase activity                                  | GO:0016937 | 0,2 | 0,4 | 1,1 | 1,0 | 1,2 | 1,0 |
| 151817_at   | FBgn0036022 | CG8329        | -                                             | serine-type endopeptidase activity                                                    | GO:0004252 | 0,2 | 0,3 | 0,9 | 1,3 | 1,3 | 1,1 |
| 145243_at   | FBgn0030837 | CG8661        | -                                             | -                                                                                     |            | 0,2 | 0,4 | 0,8 | 0,5 | 0,9 | 0,9 |
| 153373_at   | FBgn0037607 | CG8036        | -                                             | transketolase activity                                                                | GO:0004802 | 0,2 | 0,3 | 0,9 | 0,8 | 1,1 | 1,0 |
| 144675_at   | FBgn0029994 | CG2254        | -                                             | oxidoreductase activity                                                               | GO:0016491 | 0,2 | 0,4 | 1,0 | 0,9 | 1,0 | 0,9 |
| 143691_at   | FBgn0011770 | Gip           | GIP-like                                      | hydroxypyruvate isomerase activity                                                    | GO:0008903 | 0,2 | 0,4 | 0,8 | 0,6 | 1,1 | 1,1 |
| 152504_at   | FBgn0014869 | Pglym78       | Phosphoglyceromutase                          | phosphoglycerate mutase activity                                                      | GO:0004619 | 0,2 | 0,5 | 0,8 | 0,6 | 1,2 | 1,0 |
| 147459_at   | FBgn0034382 | CG18609       | -                                             | fatty acid elongase activity                                                          | GO:0009922 | 0,2 | 0,4 | 0,7 | 0,9 | 0,8 | 0,7 |
| 151490_s_at | FBgn0033462 | CG30007       | -                                             | fatty acid elongase activity                                                          | GO:0009922 | 0,2 | 0,5 | 1,1 | 1,2 | 1,3 | 1,3 |
| 151091_at   | FBgn0040606 | CG6503        | -                                             | -                                                                                     |            | 0,2 | 0,7 | 1,4 | 1,1 | 1,3 | 1,3 |
| 142951_at   | FBgn0028534 | BG:DS00941.13 | -                                             | -                                                                                     |            | 0,2 | 0,3 | 0,7 | 0,8 | 1,1 | 1,0 |
| 145058_at   | FBgn0030558 | CG1461        | -                                             | L-tyrosine:2-oxoglutarate aminotransferase activity                                   | GO:0004838 | 0,2 | 0,3 | 1,0 | 0,8 | 1,0 | 1,0 |
| 144097_at   | FBgn0025814 | Mgstl         | Microsomal glutathione S-transferase-like     | glutathione transferase activity                                                      | GO:0004364 | 0,2 | 0,4 | 1,6 | 1,4 | 1,4 | 1,5 |
| 149594_at   | FBgn0037764 | CG9459        | -                                             | fatty acid elongase activity                                                          | GO:0009922 | 0,2 | 0,4 | 1,0 | 1,0 | 1,1 | 1,0 |
| 152534_at   | FBgn0032889 | CG9331        | -                                             | oxidoreductase activity, acting on the CH-OH group of donors, NAD or NADP as acceptor | GO:0016616 | 0,2 | 0,3 | 1,2 | 1,0 | 1,2 | 1,1 |

|             |             |               |                                              |                                                                                       |            |     |     |     |     |     |     |
|-------------|-------------|---------------|----------------------------------------------|---------------------------------------------------------------------------------------|------------|-----|-----|-----|-----|-----|-----|
| 151781_at   | FBgn0039342 | CG5107        | -                                            | -                                                                                     |            | 0,2 | 0,3 | 1,2 | 1,1 | 0,9 | 1,1 |
| 152083_at   | FBgn0034390 | CG15093       | -                                            | 3-hydroxyisobutyrate dehydrogenase activity                                           | GO:0008442 | 0,2 | 0,3 | 0,9 | 0,9 | 1,1 | 1,0 |
| 154763_at   | FBgn0036572 | Pgm           | phosphoglucose mutase                        | -                                                                                     |            | 0,2 | 0,4 | 0,9 | 0,7 | 1,0 | 0,9 |
| 141703_at   | FBgn0032076 | CG9510        | -                                            | argininosuccinate lyase activity                                                      | GO:0004056 | 0,2 | 0,4 | 0,9 | 0,8 | 0,9 | 0,9 |
| 152573_at   | FBgn0038032 | CG10097       | -                                            | fatty-acyl-CoA reductase (alcohol-forming) activity                                   | GO:0080019 | 0,2 | 0,6 | 0,6 | 0,5 | 0,6 | 0,5 |
| 144227_at   | FBgn0028526 | BG:DS01759.2  | -                                            | -                                                                                     |            | 0,2 | 0,6 | 1,6 | 1,4 | 1,3 | 1,4 |
| 143608_at   | FBgn0010387 | Dbi           | Diazepam-binding inhibitor                   | fatty-acyl-CoA binding                                                                | GO:0000062 | 0,2 | 0,4 | 0,9 | 0,8 | 1,0 | 0,8 |
| 149838_at   | FBgn0038147 | CG14375       | CCHamide-2                                   | neuropeptide hormone activity                                                         | GO:0005184 | 0,2 | 0,5 | 1,2 | 1,0 | 1,2 | 1,1 |
| 152006_at   | FBgn0035670 | CG10472       | -                                            | serine-type endopeptidase activity                                                    | GO:0004252 | 0,2 | 0,4 | 0,9 | 0,8 | 1,1 | 1,0 |
| 146994_at   | FBgn0033596 | CG7738        | -                                            | -                                                                                     |            | 0,2 | 0,3 | 0,9 | 1,1 | 0,9 | 1,2 |
| 145332_at   | FBgn0030968 | CG7322        | -                                            | oxidoreductase activity, acting on CH-OH group of donors                              | GO:0016614 | 0,2 | 0,4 | 0,9 | 0,6 | 0,8 | 0,8 |
| 141208_at   | FBgn0015623 | Cpr           | Cytochrome P450 reductase                    | NADPH-hemoprotein reductase activity                                                  | GO:0003958 | 0,2 | 0,5 | 0,9 | 1,3 | 0,8 | 0,8 |
| 143622_at   | FBgn0010423 | TpnC47D       | Troponin C at 47D                            | calcium ion binding                                                                   | GO:0005509 | 0,2 | 0,4 | 0,6 | 0,4 | 0,7 | 0,5 |
| 151826_at   | FBgn0037913 | CG6783        | fatty acid bindin protein                    | fatty acid binding                                                                    | GO:0005504 | 0,2 | 0,4 | 1,0 | 0,9 | 1,0 | 1,0 |
| 151851_at   | FBgn0027611 | BcDNA:GH02419 | Lysosomal alpha-mannosidase                  | alpha-mannosidase activity                                                            | GO:0004559 | 0,2 | 0,4 | 2,1 | 1,8 | 2,1 | 2,2 |
| 152669_at   | FBgn0020385 | Pug           | pugilist                                     | formate-tetrahydrofolate ligase activity                                              | GO:0004329 | 0,2 | 0,5 | 0,9 | 0,9 | 1,0 | 1,3 |
| 151800_at   | FBgn0034229 | CG4847        | -                                            | cysteine-type peptidase activity                                                      | GO:0008234 | 0,2 | 0,5 | 0,7 | 0,5 | 0,8 | 0,7 |
| 144037_at   | FBgn0024957 | Irp-1B        | Iron regulatory protein 1B                   | iron ion binding                                                                      | GO:0005506 | 0,2 | 0,4 | 1,0 | 1,4 | 1,4 | 1,0 |
| 148646_at   | FBgn0036270 | CG32100       | -                                            | -                                                                                     |            | 0,2 | 0,4 | 1,0 | 0,7 | 1,4 | 1,0 |
| 154230_at   | FBgn0035925 | CG32030       | Formin homology 2 domain containing ortholog | -                                                                                     |            | 0,2 | 0,6 | 1,2 | 0,5 | 1,5 | 1,0 |
| 152925_at   | FBgn0037230 | CG9780        | -                                            | metalloendopeptidase activity                                                         | GO:0004222 | 0,2 | 0,5 | 1,0 | 0,9 | 0,9 | 1,0 |
| 152227_at   | FBgn0038407 | CG6126        | -                                            | organic cation transmembrane transporter activity                                     | GO:0015101 | 0,2 | 0,3 | 0,7 | 1,0 | 1,1 | 0,8 |
| 152709_at   | FBgn0035717 | Prat2         | Phosphoribosylamidotransferase 2             | -                                                                                     |            | 0,2 | 0,7 | 0,8 | 0,8 | 1,0 | 1,1 |
| 151819_at   | FBgn0038878 | CG3301        | -                                            | oxidoreductase activity, acting on the CH-OH group of donors, NAD or NADP as acceptor | GO:0016616 | 0,2 | 0,4 | 1,0 | 0,8 | 1,0 | 0,9 |
| 144829_at   | FBgn0030237 | CG15209       | -                                            | -                                                                                     |            | 0,2 | 0,3 | 1,3 | 1,1 | 1,1 | 1,0 |
| 145395_at   | FBgn0031069 | CG12703       | -                                            | ATPase activity, coupled to transmembrane movement of substances                      | GO:0042626 | 0,2 | 0,5 | 1,2 | 1,2 | 1,3 | 0,9 |
| 153434_at   | FBgn0001208 | Hn            | Henna                                        | phenylalanine 4-monooxygenase activity                                                | GO:0004505 | 0,2 | 0,6 | 2,2 | 1,8 | 2,2 | 2,1 |
| 141317_at   | FBgn0038577 | CG12321       | -                                            | -                                                                                     |            | 0,2 | 0,3 | 0,9 | 1,0 | 0,9 | 1,0 |
| 143339_i_at | FBgn0003357 | Ser99Db       | Jonah 99Ciii                                 | serine-type peptidase activity                                                        | GO:0008236 | 0,2 | 1,0 | 0,8 | 0,6 | 1,0 | 0,9 |
| 151887_at   | FBgn0031502 | v(2)k05816    | v(2)k05816                                   | zinc ion binding                                                                      | GO:0008270 | 0,2 | 0,6 | 0,9 | 2,5 | 1,2 | 1,2 |
| 154963_at   | FBgn0032783 | CG10237       | -                                            | retinal binding                                                                       | GO:0016918 | 0,2 | 0,5 | 0,9 | 1,0 | 1,1 | 0,9 |
| 143175_at   | FBgn0001092 | Gapdh2        | Glyceraldehyde 3 phosphate dehydrogenase 2   | glyceraldehyde-3-phosphate dehydrogenase (NAD+) (phosphorylating) activity            | GO:0004365 | 0,2 | 0,5 | 1,1 | 1,4 | 1,4 | 1,1 |
| 146311_at   | FBgn0032472 | CG9928        | -                                            | -                                                                                     |            | 0,2 | 0,8 | 2,7 | 2,3 | 1,9 | 2,1 |
| 151797_at   | FBgn0032820 | fbp           | fructose-1,6-bisphosphatase                  | fructose 1,6-bisphosphate 1-phosphatase activity                                      | GO:0042132 | 0,2 | 0,5 | 1,0 | 0,8 | 1,1 | 0,9 |
| 152442_at   | FBgn0038898 | CG31233       | -                                            | metallopeptidase activity                                                             | GO:0008237 | 0,2 | 0,4 | 0,9 | 0,7 | 1,4 | 1,1 |
| 152015_at   | FBgn0010019 | Cyp4g1        | Cytochrome P450-4g1                          | electron carrier activity                                                             | GO:0009055 | 0,2 | 0,9 | 1,4 | 1,3 | 1,4 | 1,4 |
| 150697_at   | FBgn0039468 | CG31075       | -                                            | -                                                                                     |            | 0,2 | 0,4 | 1,0 | 0,8 | 1,0 | 1,0 |
| 152013_at   | FBgn0027586 | BcDNA:GH05536 | -                                            | -                                                                                     |            | 0,2 | 0,4 | 0,9 | 0,8 | 1,2 | 1,1 |
| 141527_at   | FBgn0023479 | Tequila       | Tequila                                      | serine-type endopeptidase activity                                                    | GO:0004252 | 0,2 | 0,5 | 1,1 | 0,8 | 1,0 | 1,0 |
| 145844_at   | FBgn0031734 | CG11147       | -                                            | ATPase activity, coupled to transmembrane movement of substances                      | GO:0042626 | 0,2 | 0,4 | 1,3 | 1,0 | 1,3 | 1,1 |
| 146808_at   | FBgn0033294 | CG8693        | Maltase A4                                   | alpha-glucosidase activity                                                            | GO:0004558 | 0,2 | 0,3 | 0,8 | 1,0 | 1,1 | 1,2 |
| 151795_at   | FBgn0035881 | ldh           | Isocitrate dehydrogenase                     | -                                                                                     |            | 0,2 | 0,4 | 1,0 | 1,0 | 1,3 | 1,1 |
| 146489_at   | FBgn0032777 | DPXN          | Paxillin                                     | zinc ion binding                                                                      | GO:0008270 | 0,2 | 0,7 | 0,9 | 0,6 | 1,0 | 0,8 |
| 152137_at   | FBgn0039754 | CG9747        | -                                            | acyl-CoA delta11-desaturase activity                                                  | GO:0017105 | 0,2 | 0,4 | 0,7 | 0,5 | 0,9 | 0,7 |
| 152456_at   | FBgn0019643 | Dat           | Dopamine N acetyltransferase                 | N-acetyltransferase activity                                                          | GO:0008080 | 0,2 | 0,3 | 0,7 | 0,6 | 0,8 | 0,7 |

|             |             |               |                                           |                                                                 |            |     |     |     |     |     |     |
|-------------|-------------|---------------|-------------------------------------------|-----------------------------------------------------------------|------------|-----|-----|-----|-----|-----|-----|
| 141435_at   | FBgn0031249 | CG11911       | -                                         | serine-type endopeptidase activity                              | GO:0004252 | 0,2 | 0,3 | 0,5 | 0,5 | 1,0 | 0,7 |
| 143464_f_at | FBgn0004425 | LysB          | Lysozyme B                                | lysozyme activity                                               | GO:0003796 | 0,2 | 0,5 | 0,6 | 0,5 | 0,9 | 0,7 |
| 147436_at   | FBgn0034337 | CG17524       | Glutathione S transferase E3              | glutathione transferase activity                                | GO:0004364 | 0,2 | 0,4 | 0,8 | 1,1 | 1,1 | 1,1 |
| 145890_at   | FBgn0031801 | CG9498        | -                                         | transferase activity, transferring phosphorus-containing groups | GO:0016772 | 0,2 | 0,3 | 2,1 | 1,6 | 2,0 | 1,5 |
| 153769_at   | FBgn0012034 | AcCoA5        | Acetyl Coenzyme A synthase                | acetate-CoA ligase activity                                     | GO:0003987 | 0,2 | 0,5 | 1,1 | 0,9 | 1,0 | 0,8 |
| 149473_at   | FBgn0037547 | CG7910        | -                                         | fatty acid amide hydrolase activity                             | GO:0017064 | 0,2 | 0,8 | 1,7 | 1,5 | 1,4 | 1,3 |
| 148259_at   | FBgn0035673 | CG6602        | -                                         | -                                                               |            | 0,2 | 0,2 | 0,6 | 0,7 | 0,6 | 0,6 |
| 146060_at   | FBgn0032087 | CG9568        | -                                         | -                                                               |            | 0,2 | 0,6 | 0,9 | 1,3 | 0,7 | 0,8 |
| 143062_at   | FBgn0000053 | ade3          | adenosine 3                               | phosphoribosylamine-glycine ligase activity                     | GO:0004637 | 0,2 | 0,7 | 0,8 | 0,9 | 1,1 | 1,0 |
| 142950_at   | FBgn0028533 | BG:DS00941.14 | -                                         | -                                                               |            | 0,2 | 0,5 | 0,8 | 0,8 | 0,9 | 1,1 |
| 153323_at   | FBgn0023537 | EG:171D11.1   | -                                         | methylmalonate-semialdehyde dehydrogenase (acylating) activity  | GO:0004491 | 0,3 | 0,4 | 0,6 | 0,5 | 0,8 | 0,8 |
| 146620_s_at | FBgn0032985 | CG12628       | -                                         | -                                                               |            | 0,3 | 0,5 | 1,8 | 1,4 | 1,7 | 1,7 |
| 150703_at   | FBgn0039475 | CG6277        | -                                         | phosphatidylcholine 1-acylhydrolase activity                    | GO:0008970 | 0,3 | 0,5 | 0,6 | 0,9 | 1,1 | 1,1 |
| 150404_at   | FBgn0039031 | CG17244       | -                                         | cytokine activity                                               | GO:0005125 | 0,3 | 0,4 | 1,8 | 1,9 | 1,6 | 1,7 |
| 147235_at   | FBgn0033999 | CG8093        | -                                         | lipase activity                                                 | GO:0016298 | 0,3 | 0,4 | 0,9 | 0,7 | 1,0 | 1,1 |
| 145636_at   | FBgn0031417 | CG3597        | -                                         | oxidoreductase activity                                         | GO:0016491 | 0,3 | 0,4 | 1,1 | 0,9 | 1,1 | 1,0 |
| 146746_at   | FBgn0033189 | Cyt-b5        | Cytochrome b5                             | heme binding                                                    | GO:0020037 | 0,3 | 0,4 | 1,0 | 1,0 | 1,0 | 0,9 |
| 152604_at   | FBgn0036015 | CG3088        | -                                         | serine-type endopeptidase activity                              | GO:0004252 | 0,3 | 0,8 | 1,4 | 1,6 | 1,6 | 1,4 |
| 154747_at   | FBgn0034406 | Jheh3         | Juvenile hormone epoxide hydrolase 3      | juvenile hormone epoxide hydrolase activity                     | GO:0008096 | 0,3 | 0,2 | 0,6 | 0,6 | 0,9 | 0,9 |
| 152049_at   | FBgn0028493 | Peb           | Protein ejaculatory bulb                  | -                                                               |            | 0,3 | 0,8 | 1,2 | 0,9 | 1,2 | 1,2 |
| 154086_at   | FBgn0033797 | CG13328       | -                                         | -                                                               |            | 0,3 | 0,4 | 0,7 | 0,7 | 0,9 | 0,9 |
| 143093_at   | FBgn0000261 | Cat           | Catalase                                  | antioxidant activity                                            | GO:0016209 | 0,3 | 0,4 | 1,4 | 1,3 | 1,4 | 1,2 |
| 148055_at   | FBgn0035356 | CG16986       | -                                         | -                                                               |            | 0,3 | 0,4 | 1,1 | 0,9 | 1,1 | 0,9 |
| 143958_at   | FBgn0022355 | Tsf1          | Transferrin 1                             | ferric iron binding                                             | GO:0008199 | 0,3 | 0,7 | 1,9 | 1,5 | 1,7 | 1,6 |
| 154343_at   | FBgn0030594 | CG9509        | -                                         | choline dehydrogenase activity                                  | GO:0008812 | 0,3 | 0,6 | 0,7 | 0,6 | 0,8 | 0,7 |
| 141639_at   | FBgn0030478 | CG1640        | -                                         | L-alanine:2-oxoglutarate aminotransferase activity              | GO:0004021 | 0,3 | 0,5 | 0,6 | 0,5 | 0,7 | 0,5 |
| 144220_at   | FBgn0028510 | BG:DS07851.3  | UK114                                     | deaminase activity                                              | GO:0019239 | 0,3 | 0,4 | 0,9 | 0,9 | 1,3 | 1,1 |
| 152455_at   | FBgn0037146 | CG7470        | -                                         | delta1-pyrroline-5-carboxylate synthetase activity              | GO:0017084 | 0,3 | 0,6 | 0,8 | 0,8 | 0,8 | 0,8 |
| 153364_at   | FBgn0031845 | CG9232        | Galactose-1-phosphate uridylyltransferase | -                                                               |            | 0,3 | 0,3 | 1,1 | 1,2 | 1,3 | 1,2 |
| 154730_at   | FBgn0034618 | CG9485        | -                                         | 4-alpha-glucanotransferase activity                             | GO:0004134 | 0,3 | 0,6 | 0,8 | 0,7 | 1,3 | 1,2 |
| 153031_at   | FBgn0038037 | Cyp9f2        | Cyp9f2                                    | electron carrier activity                                       | GO:0009055 | 0,3 | 0,4 | 1,1 | 1,2 | 1,0 | 1,2 |
| 153665_at   | FBgn0017558 | Pdk           | Pyruvate dehydrogenase kinase             | pyruvate dehydrogenase (acetyl-transferring) kinase activity    | GO:0004740 | 0,3 | 0,9 | 0,7 | 0,8 | 0,7 | 0,7 |
| 152383_at   | FBgn0000116 | Argk          | Arginine kinase                           | arginine kinase activity                                        | GO:0004054 | 0,3 | 0,7 | 0,9 | 0,6 | 1,0 | 0,9 |
| 141674_at   | FBgn0003178 | PyK           | Pyruvate kinase                           | pyruvate kinase activity                                        | GO:0004743 | 0,3 | 0,6 | 0,9 | 0,8 | 1,0 | 0,9 |
| 143127_at   | FBgn0000473 | Cyp6a2        | Cytochrome P450-6a2                       | electron carrier activity                                       | GO:0009055 | 0,3 | 0,7 | 1,2 | 1,2 | 1,4 | 1,2 |
| 147472_at   | FBgn0034405 | Jheh2         | Juvenile hormone epoxide hydrolase 2      | juvenile hormone epoxide hydrolase activity                     | GO:0008096 | 0,3 | 0,4 | 0,9 | 0,8 | 0,9 | 0,9 |
| 153435_at   | FBgn0011211 | blw           | bellwether                                | hydrogen-exporting ATPase activity, phosphorylative mechanism   | GO:0008553 | 0,3 | 0,7 | 1,1 | 0,7 | 1,3 | 1,0 |
| 151882_at   | FBgn0033093 | CG3270        | -                                         | oxidoreductase activity                                         | GO:0016491 | 0,3 | 0,5 | 1,0 | 0,9 | 1,0 | 1,0 |
| 145897_at   | FBgn0031810 | CG9511        | -                                         | -                                                               |            | 0,3 | 0,5 | 1,2 | 1,2 | 1,0 | 1,0 |
| 151909_at   | FBgn0032350 | CG6287        | -                                         | phosphoglycerate dehydrogenase activity                         | GO:0004617 | 0,3 | 0,6 | 1,9 | 1,7 | 1,8 | 1,9 |
| 147028_i_at | FBgn0033643 | CG30035       | Trehalose transporter 1-1                 | glucose transmembrane transporter activity                      | GO:0005355 | 0,3 | 0,7 | 1,7 | 1,2 | 1,3 | 1,2 |
| 150193_at   | FBgn0038702 | CG3739        | -                                         | serine-type peptidase activity                                  | GO:0008236 | 0,3 | 0,4 | 1,1 | 0,7 | 1,0 | 0,8 |
| 145728_at   | FBgn0031558 | CG16704       | -                                         | serine-type endopeptidase inhibitor activity                    | GO:0004867 | 0,3 | 0,8 | 0,6 | 0,8 | 1,2 | 1,1 |
| 153433_at   | FBgn0011693 | Pdh           | Photoreceptor dehydrogenase               | retinol dehydrogenase activity                                  | GO:0004745 | 0,3 | 0,5 | 0,6 | 0,5 | 0,9 | 1,0 |

|             |             |                              |                                          |                                                                  |            |     |     |     |     |     |     |
|-------------|-------------|------------------------------|------------------------------------------|------------------------------------------------------------------|------------|-----|-----|-----|-----|-----|-----|
| 144565_at   | FBgn0029828 | CG6067                       | -                                        | serine-type endopeptidase activity                               | GO:0004252 | 0,3 | 0,5 | 1,4 | 1,2 | 1,4 | 1,2 |
| 153782_at   | FBgn0035978 | CG4347                       | UGP                                      | UTP:glucose-1-phosphate<br>uridylyltransferase activity          | GO:0003983 | 0,3 | 0,5 | 0,9 | 0,6 | 1,0 | 0,7 |
| 152781_at   | FBgn0004654 | Pgd                          | Phosphogluconate dehydrogenase           | phosphogluconate dehydrogenase<br>(decarboxylating) activity     | GO:0004616 | 0,3 | 0,5 | 2,0 | 1,6 | 1,8 | 1,7 |
| 152233_at   | FBgn0027657 | glob1                        | globin 1                                 | oxygen transporter activity                                      | GO:0005344 | 0,3 | 0,5 | 0,9 | 1,6 | 1,0 | 1,4 |
| 143912_at   | FBgn0020236 | ATPCL                        | ATP citrate lyase                        | ATP citrate synthase activity                                    | GO:0003878 | 0,3 | 0,4 | 0,8 | 0,9 | 0,9 | 0,9 |
| 146793_at   | FBgn0033274 | CG14757                      | -                                        | -                                                                |            | 0,3 | 0,3 | 0,8 | 0,8 | 0,9 | 0,9 |
| 152515_at   | FBgn0003074 | Pgi                          | Phosphogluconate isomerase               | phosphogluconate dehydrogenase<br>(decarboxylating) activity     | GO:0004616 | 0,3 | 0,5 | 0,6 | 0,7 | 0,8 | 0,7 |
| 149882_at   | FBgn0038212 | CG31326                      | -                                        | serine-type endopeptidase activity                               | GO:0004252 | 0,3 | 0,4 | 1,8 | 1,6 | 1,5 | 1,4 |
| 153576_at   | FBgn0036182 | CG6084                       | -                                        | alditol:NADP+ 1-oxidoreductase activity                          | GO:0004032 | 0,3 | 0,4 | 1,8 | 1,1 | 1,8 | 1,6 |
| 153347_at   | FBgn0001128 | Gpdh                         | Glycerol 3 phosphate<br>dehydrogenase    | glycerol-3-phosphate dehydrogenase<br>[NAD+] activity            | GO:0004367 | 0,3 | 0,6 | 0,6 | 0,6 | 0,7 | 0,5 |
| 145698_at   | FBgn0031517 | CG15406                      | -                                        | fructose transmembrane transporter<br>activity                   | GO:0005353 | 0,3 | 0,4 | 0,6 | 0,6 | 0,8 | 0,7 |
| 152897_at   | FBgn0036422 | CG3868                       | -                                        | -                                                                |            | 0,3 | 0,5 | 1,0 | 0,9 | 1,2 | 1,1 |
| 146184_at   | FBgn0032285 | CG17108                      | -                                        | -                                                                |            | 0,3 | 0,7 | 1,2 | 1,1 | 1,5 | 1,4 |
| 141671_s_at | FBgn0032715 | CG17597                      | -                                        | acetyl-CoA C-acyltransferase activity                            | GO:0003988 | 0,3 | 0,5 | 1,5 | 1,4 | 1,6 | 1,5 |
| 143872_at   | FBgn0016123 | Aph-4                        | Alkaline phosphatase 4                   | alkaline phosphatase activity                                    | GO:0004035 | 0,3 | 0,3 | 0,8 | 0,7 | 0,7 | 0,6 |
| 143908_at   | FBgn0019982 | Gs1l                         | GS1-like                                 | hydrolase activity                                               | GO:0016787 | 0,3 | 0,7 | 1,1 | 1,1 | 1,4 | 1,2 |
| 142257_at   | FBgn0027552 | BcDNA:GH10614                | -                                        | alditol:NADP+ 1-oxidoreductase activity                          | GO:0004032 | 0,3 | 0,5 | 1,6 | 1,4 | 1,8 | 1,5 |
| 141390_at   | FBgn0033318 | l(2)44DEa                    | Acyl-CoA synthetase long-chain           | long-chain fatty acid-CoA ligase activity                        | GO:0004467 | 0,3 | 0,7 | 0,8 | 0,7 | 0,9 | 0,6 |
| 144771_at   | FBgn0030160 | CG9691                       | -                                        | -                                                                |            | 0,3 | 0,5 | 1,4 | 2,3 | 1,5 | 1,8 |
| 152970_at   | FBgn0033180 | Aldh-III                     | Aldehyde dehydrogenase type III          | -                                                                |            | 0,3 | 0,4 | 1,1 | 1,0 | 1,0 | 1,0 |
| 154262_at   | FBgn0004507 | GlyP                         | Glycogen phosphorylase                   | glycogen phosphorylase activity                                  | GO:0008184 | 0,3 | 0,7 | 0,8 | 0,5 | 1,1 | 0,8 |
| 142414_at   | FBgn0039801 | CG11315                      | Niemann-Pick type C-2h                   | sterol binding                                                   | GO:0032934 | 0,3 | 0,7 | 2,4 | 2,0 | 2,3 | 1,8 |
| 152743_at   | FBgn0029556 | CG14629                      | -                                        | -                                                                |            | 0,3 | 0,5 | 1,3 | 1,4 | 1,2 | 1,2 |
| 149569_at   | FBgn0037715 | CG9399                       | -                                        | pyruvate transmembrane transporter<br>activity                   | GO:0050833 | 0,3 | 0,5 | 1,0 | 0,7 | 1,4 | 1,0 |
| 144868_at   | FBgn0030292 | CG11752                      | -                                        | -                                                                |            | 0,3 | 0,6 | 0,7 | 0,7 | 0,8 | 0,8 |
| 143299_at   | FBgn0003067 | Pepck                        | Phosphoenolpyruvate<br>carboxykinase     | phosphoenolpyruvate carboxykinase (GTP)<br>activity              | GO:0004613 | 0,3 | 0,7 | 1,1 | 1,0 | 0,8 | 0,9 |
| 146084_at   | FBgn0032114 | CG3752                       | Aldehyde dehydrogenase                   | aldehyde dehydrogenase (NAD) activity                            | GO:0004029 | 0,3 | 0,5 | 1,1 | 1,1 | 1,2 | 1,1 |
| 146173_at   | FBgn0032272 | CG31872                      | -                                        | triglyceride lipase activity                                     | GO:0004806 | 0,3 | 0,7 | 1,2 | 0,8 | 1,2 | 1,3 |
| 153423_at   | FBgn0011280 | Pbprp2                       | Odorant-binding protein 19d              | pheromone binding                                                | GO:0005550 | 0,3 | 0,5 | 1,3 | 1,2 | 1,2 | 1,4 |
| 141568_at   | FBgn0030362 | regucalcin                   | regucalcin                               | -                                                                |            | 0,3 | 0,6 | 1,3 | 1,0 | 1,2 | 1,1 |
| 148295_at   | FBgn0035726 | CG9953                       | -                                        | serine-type carboxypeptidase activity                            | GO:0004185 | 0,3 | 0,6 | 1,5 | 1,3 | 1,3 | 1,3 |
| 141757_at   | FBgn0039674 | CG1907                       | -                                        | oxoglutarate:malate antiporter activity                          | GO:0015367 | 0,3 | 0,5 | 0,8 | 0,8 | 1,0 | 0,8 |
| 153188_at   | FBgn0027919 | SPC 21-kDa-like              | twisted bristles roughened eye           | serine-type peptidase activity                                   | GO:0008236 | 0,3 | 0,5 | 0,7 | 0,7 | 0,7 | 0,6 |
| 152801_at   | FBgn0031380 | CG4233                       | Glutamate oxaloacetate<br>transaminase 2 | -                                                                |            | 0,3 | 0,6 | 0,7 | 0,6 | 0,9 | 0,7 |
| 146528_at   | FBgn0032839 | CG10659                      | -                                        | N-acetyltransferase activity                                     | GO:0008080 | 0,3 | 0,6 | 0,9 | 0,9 | 0,8 | 0,9 |
| 150181_at   | FBgn0038681 | Cyp12a4                      | Cyp12a4                                  | electron carrier activity                                        | GO:0009055 | 0,3 | 0,4 | 1,1 | 1,1 | 1,2 | 1,2 |
| 143911_at   | FBgn0020235 | ATPsyn-gamma                 | ATP synthase-gamma chain                 | hydrogen-exporting ATPase activity,<br>phosphorylative mechanism | GO:0008553 | 0,3 | 0,7 | 1,0 | 0,6 | 1,3 | 1,0 |
| 142390_at   | FBgn0031538 | CG3246                       | -                                        | lipid binding                                                    | GO:0008289 | 0,3 | 0,5 | 1,6 | 1,9 | 1,6 | 1,6 |
| 154031_at   | FBgn0013763 | Chit                         | -                                        | chitinase activity                                               | GO:0004568 | 0,3 | 0,5 | 1,9 | 1,5 | 1,4 | 1,4 |
| 149114_at   | FBgn0036969 | CG6663                       | Serpin 77Bb                              | serine-type endopeptidase inhibitor<br>activity                  | GO:0004867 | 0,3 | 0,5 | 0,7 | 0,6 | 1,2 | 0,9 |
| 152692_at   | FBgn0027621 | 6-phosphofructo-2-<br>kinase | 6-phosphofructo-2-kinase                 | 6-phosphofructo-2-kinase activity                                | GO:0003873 | 0,3 | 0,5 | 0,9 | 0,8 | 0,9 | 0,7 |
| 144596_at   | FBgn0029869 | CG3861                       | knockdown                                | citrate (Si)-synthase activity                                   | GO:0004108 | 0,3 | 0,8 | 1,0 | 0,3 | 1,2 | 0,7 |
| 143150_at   | FBgn0000579 | Eno                          | Enolase                                  | phosphopyruvate hydratase activity                               | GO:0004634 | 0,3 | 0,7 | 1,0 | 0,8 | 1,1 | 1,0 |
| 142555_at   | FBgn0004169 | up                           | upheld                                   | tropomyosin binding                                              | GO:0005523 | 0,3 | 0,9 | 1,0 | 0,6 | 1,2 | 0,9 |
| 141528_at   | FBgn0004145 | Vha16                        | Vacuolar H+ ATPase 16kD subunit 1        | proton-transporting ATPase activity,<br>rotational mechanism     | GO:0046961 | 0,3 | 0,8 | 1,5 | 1,2 | 1,9 | 1,6 |



|             |             |                 |                                   |                                                                                       |            |     |     |     |     |     |     |
|-------------|-------------|-----------------|-----------------------------------|---------------------------------------------------------------------------------------|------------|-----|-----|-----|-----|-----|-----|
| 150588_at   | FBgn0039330 | CG11909         | target of brain insulin           | alpha-glucosidase activity.                                                           | GO:0004558 | 0,3 | 0,5 | 0,8 | 0,8 | 0,8 | 0,9 |
| 145592_at   | FBgn0031352 | RFe5P           | Rieske iron-sulfur protein        | ubiquinol-cytochrome-c reductase activity                                             | GO:0008121 | 0,3 | 0,6 | 0,8 | 0,7 | 1,1 | 0,9 |
| 145202_at   | FBgn0030775 | CG9673          | -                                 | serine-type endopeptidase activity                                                    | GO:0004252 | 0,3 | 0,6 | 1,0 | 0,8 | 1,1 | 0,9 |
| 141232_at   | FBgn0038326 | CG5044          | -                                 | 3-hydroxyisobutyryl-CoA hydrolase activity                                            | GO:0003860 | 0,3 | 0,6 | 0,8 | 1,0 | 0,8 | 0,8 |
| 148103_at   | FBgn0035434 | drosomycin-like | Drosomycin-like 5                 | molecular_function                                                                    | GO:0003674 | 0,3 | 0,6 | 1,3 | 1,6 | 1,6 | 1,8 |
| 144561_at   | FBgn0029823 | CG3011          | -                                 | glycine hydroxymethyltransferase activity                                             | GO:0004372 | 0,3 | 0,6 | 0,9 | 0,9 | 1,1 | 1,0 |
| 152494_at   | FBgn0033065 | Cyp6w1          | Cyp6w1                            | electron carrier activity                                                             | GO:0009055 | 0,3 | 0,6 | 1,3 | 1,3 | 1,3 | 1,0 |
| 149663_at   | FBgn0037861 | Ugt86Dd         | Ugt86Dd                           | glucuronosyltransferase activity.                                                     | GO:0015020 | 0,3 | 0,4 | 0,9 | 0,9 | 0,9 | 1,2 |
| 149722_at   | FBgn0037973 | CG18547         | -                                 | oxidoreductase activity                                                               | GO:0016491 | 0,3 | 0,4 | 0,9 | 1,4 | 1,1 | 1,3 |
| 150297_at   | FBgn0038858 | CG5793          | -                                 | catalytic activity                                                                    | GO:0003824 | 0,3 | 0,5 | 1,0 | 0,8 | 1,5 | 1,2 |
| 143427_at   | FBgn0004117 | Tm2             | Tropomyosin 2                     | actin binding                                                                         | GO:0003779 | 0,3 | 1,0 | 1,0 | 0,7 | 1,2 | 0,9 |
| 146138_at   | FBgn0032213 | CG5390          | -                                 | serine-type endopeptidase activity                                                    | GO:0004252 | 0,3 | 0,5 | 1,6 | 1,6 | 1,4 | 1,6 |
| 142746_at   | FBgn0038081 | Men             | Malic enzyme                      | NAD binding                                                                           | GO:0051287 | 0,3 | 0,5 | 0,8 | 0,7 | 0,8 | 0,7 |
| 144712_at   | FBgn0030059 | Hexo2           | Hexosaminidase 2                  | beta-N-acetylglucosaminidase activity                                                 | GO:0016231 | 0,3 | 0,5 | 1,4 | 1,0 | 1,1 | 1,0 |
| 147775_at   | FBgn0034860 | CG9812          | -                                 | -                                                                                     | -          | 0,3 | 0,5 | 1,1 | 0,8 | 1,1 | 1,1 |
| 141801_at   | FBgn0031449 | CG9892          | -                                 | ATPase activity, coupled to transmembrane movement of substances                      | GO:0042626 | 0,3 | 0,4 | 0,7 | 0,8 | 0,6 | 0,7 |
| 151808_at   | FBgn0035212 | l(3)02640       | lethal (3) 02640                  | -                                                                                     | -          | 0,3 | 0,7 | 1,0 | 1,7 | 1,1 | 1,1 |
| 142222_at   | FBgn0015039 | Cyp9b2          | Cytochrome P450-9b2               | electron carrier activity                                                             | GO:0009055 | 0,3 | 0,6 | 1,6 | 2,0 | 1,5 | 1,6 |
| 146216_at   | FBgn0032325 | l(2)06225       | lethal (2) 06225                  | hydrogen-exporting ATPase activity                                                    | GO:0036442 | 0,3 | 0,5 | 2,5 | 1,8 | 1,9 | 2,1 |
| 143358_at   | FBgn0003462 | Sod             | Superoxide dismutase              | superoxide dismutase activity                                                         | GO:0004784 | 0,3 | 0,5 | 1,0 | 1,0 | 1,2 | 1,0 |
| 149085_at   | FBgn0036927 | CG7433          | -                                 | 4-aminobutyrate transaminase activity                                                 | GO:0003867 | 0,3 | 0,6 | 0,7 | 0,5 | 0,9 | 0,8 |
| 143301_at   | FBgn0003075 | Pgk             | Phosphoglycerate kinase           | phosphoglycerate kinase activity                                                      | GO:0004618 | 0,3 | 0,7 | 0,9 | 0,6 | 1,2 | 1,0 |
| 150603_at   | FBgn0039358 | CG5028          | -                                 | isocitrate dehydrogenase (NAD+) activity                                              | GO:0004449 | 0,3 | 0,7 | 0,9 | 0,6 | 1,1 | 0,9 |
| 146810_at   | FBgn0033297 | CG8690          | Maltase A8                        | alpha-glucosidase activity                                                            | GO:0004558 | 0,3 | 0,5 | 1,1 | 0,7 | 0,9 | 1,1 |
| 153785_at   | FBgn0034117 | CG7997          | -                                 | alpha-galactosidase activity                                                          | GO:0004557 | 0,3 | 0,9 | 1,7 | 1,9 | 1,4 | 1,5 |
| 147029_s_at | FBgn0033643 | CG30035         | Trehalose transporter 1-1         | glucose transmembrane transporter activity                                            | GO:0005355 | 0,3 | 0,8 | 1,4 | 1,2 | 1,3 | 1,1 |
| 155150_at   | FBgn0037912 | CG6782          | scheggia                          | tricarboxylate secondary active transmembrane transporter activity                    | GO:0005371 | 0,3 | 0,5 | 0,8 | 0,9 | 1,0 | 0,8 |
| 152081_at   | FBgn0036760 | CG5567          | -                                 | phosphatase activity                                                                  | GO:0016791 | 0,3 | 0,6 | 1,1 | 1,0 | 1,0 | 0,9 |
| 144787_at   | FBgn0030184 | CG2968          | lethal (1) G0230                  | proton-transporting ATP synthase activity, rotational mechanism                       | GO:0046933 | 0,3 | 0,6 | 0,9 | 0,6 | 1,3 | 0,9 |
| 146175_at   | FBgn0032275 | CG17097         | -                                 | lipase activity                                                                       | GO:0016298 | 0,3 | 0,6 | 0,9 | 0,7 | 0,9 | 0,8 |
| 148253_at   | FBgn0035664 | CG6467          | Jonah 65Aiv                       | serine-type endopeptidase activity                                                    | GO:0004252 | 0,3 | 0,8 | 1,1 | 1,1 | 1,5 | 1,4 |
| 151360_at   | FBgn0040887 | CG7418          | -                                 | molecular_function                                                                    | GO:0003674 | 0,3 | 0,7 | 0,6 | 0,6 | 0,6 | 0,6 |
| 152120_at   | FBgn0038194 | Cyp6d5          | Cyp6d5                            | electron carrier activity                                                             | GO:0009055 | 0,3 | 0,4 | 1,4 | 1,2 | 1,3 | 1,2 |
| 153050_at   | FBgn0036910 | Cyp305a1        | Cyp305a1                          | electron carrier activity                                                             | GO:0009055 | 0,3 | 0,4 | 0,9 | 0,9 | 1,0 | 1,0 |
| 152242_at   | FBgn0039213 | CG6668          | atlastin                          | protein homodimerization activity                                                     | GO:0042803 | 0,3 | 0,5 | 0,6 | 0,8 | 0,5 | 0,6 |
| 152841_at   | FBgn0038774 | CG5023          | -                                 | actin binding                                                                         | GO:0003779 | 0,3 | 0,7 | 0,8 | 0,6 | 0,9 | 1,0 |
| 143310_at   | FBgn0003134 | Pp1alpha-96A    | Protein phosphatase 1alpha at 96A | protein serine/threonine phosphatase activity                                         | GO:0004722 | 0,3 | 0,8 | 1,7 | 1,4 | 1,6 | 1,5 |
| 148484_at   | FBgn0036030 | CG6767          | -                                 | ribose phosphate diphosphokinase activity                                             | GO:0004749 | 0,3 | 0,8 | 1,2 | 1,1 | 1,6 | 1,5 |
| 143929_at   | FBgn0020508 | Ag5r2           | Antigen 5-related 2               | molecular_function                                                                    | GO:0003674 | 0,3 | 0,6 | 0,7 | 0,8 | 1,2 | 1,0 |
| 145193_at   | FBgn0015374 | crI             | courtless                         | ubiquitin-protein ligase activity                                                     | GO:0004842 | 0,3 | 0,6 | 0,9 | 0,9 | 0,9 | 0,8 |
| 154613_at   | FBgn0031360 | CG17711         | -                                 | oxidoreductase activity, acting on the CH-OH group of donors, NAD or NADP as acceptor | GO:0016616 | 0,3 | 0,5 | 0,9 | 0,9 | 1,1 | 1,0 |
| 152426_at   | FBgn0036211 | CG5946          | -                                 | cytochrome-b5 reductase activity, acting on NAD(P)H                                   | GO:0004128 | 0,3 | 0,5 | 0,6 | 0,6 | 0,7 | 0,6 |
| 150796_at   | FBgn0039620 | CG1443          | waterproof                        | fatty-acyl-CoA reductase (alcohol-forming) activity                                   | GO:0080019 | 0,3 | 1,0 | 1,3 | 1,3 | 1,7 | 1,5 |
| 144581_at   | FBgn0029849 | CG3774          | ER GDP-fucose transporter         | nucleotide-sugar transmembrane transporter activity                                   | GO:0005338 | 0,3 | 0,5 | 0,8 | 0,8 | 0,9 | 0,9 |
| 143657_at   | FBgn0011336 | OstStt3         | Oligosaccharyl transferase 3      | oligosaccharyl transferase activity                                                   | GO:0004576 | 0,3 | 0,5 | 0,8 | 0,9 | 0,9 | 0,8 |
| 142709_s_at | FBgn0033878 | CG6543          | -                                 | enoyl-CoA hydratase activity                                                          | GO:0004300 | 0,3 | 0,5 | 1,4 | 1,1 | 1,3 | 1,2 |

|             |             |               |                                           |                                                                                                   |            |     |     |     |     |     |     |
|-------------|-------------|---------------|-------------------------------------------|---------------------------------------------------------------------------------------------------|------------|-----|-----|-----|-----|-----|-----|
| 149828_at   | FBgn0038130 | CG8630        | -                                         | stearoyl-CoA 9-desaturase activity                                                                | GO:0004768 | 0,3 | 0,7 | 1,2 | 0,9 | 1,2 | 1,1 |
| 142413_at   | FBgn0039800 | CG11314       | Niemann-Pick type C-2g                    | sterol binding                                                                                    | GO:0032934 | 0,3 | 0,6 | 1,2 | 1,1 | 1,0 | 0,8 |
| 147407_at   | FBgn0034292 | CG5767        | -                                         | -                                                                                                 |            | 0,3 | 0,5 | 0,7 | 0,8 | 0,9 | 0,9 |
| 143979_at   | FBgn0023211 | Elongin C     | Elongin C                                 | -                                                                                                 |            | 0,3 | 0,5 | 0,9 | 1,2 | 0,9 | 0,9 |
| 142969_at   | FBgn0004629 | Cys           | Cystatin-like                             | cysteine-type endopeptidase inhibitor activity                                                    | GO:0004869 | 0,3 | 0,6 | 4,0 | 2,4 | 4,0 | 2,5 |
| 142537_at   | FBgn0034340 | CG17530       | Glutathione S transferase E6              | glutathione transferase activity                                                                  | GO:0004364 | 0,3 | 0,5 | 0,9 | 1,6 | 1,1 | 1,3 |
| 151549_i_at | FBgn0039791 | CG9708        | prolyl-4-hydroxylase-alpha NE3            | iron ion binding                                                                                  | GO:0005506 | 0,4 | 0,5 | 0,6 | 0,6 | 0,6 | 0,5 |
| 149794_at   | FBgn0038074 | CG6188        | -                                         | glycine N-methyltransferase activity                                                              | GO:0017174 | 0,4 | 0,7 | 1,4 | 1,0 | 1,2 | 1,1 |
| 152431_at   | FBgn0028480 | BcDNA:GH12326 | -                                         | -                                                                                                 |            | 0,4 | 0,5 | 0,7 | 0,7 | 0,6 | 0,8 |
| 143871_at   | FBgn0016120 | ATPsyn-d      | ATP synthase, subunit d                   | hydrogen-exporting ATPase activity, phosphorylative mechanism                                     | GO:0008553 | 0,4 | 0,7 | 1,1 | 0,8 | 1,3 | 1,1 |
| 142499_at   | FBgn0019830 | colt          | congested-like trachea                    | carnitine:acyl carnitine antiporter activity                                                      | GO:0005476 | 0,4 | 0,5 | 1,1 | 1,0 | 1,2 | 1,0 |
| 154182_at   | FBgn0039562 | Gp93          | Glycoprotein 93                           | unfolded protein binding                                                                          | GO:0051082 | 0,4 | 0,6 | 1,7 | 1,3 | 1,5 | 1,3 |
| 146151_at   | FBgn0032237 | CG5362        | Malate dehydrogenase 1                    | L-malate dehydrogenase activity                                                                   | GO:0030060 | 0,4 | 0,6 | 1,0 | 0,8 | 1,0 | 1,0 |
| 154410_at   | FBgn0035147 | CG12030       | UDP-galactose 4'-epimerase                | UDP-glucose 4-epimerase activity                                                                  | GO:0003978 | 0,4 | 0,5 | 0,7 | 1,1 | 0,8 | 0,9 |
| 151418_at   | FBgn0040954 | CG13779       | Sem1 ortholog (S. cerevisiae)             | peptidase activity                                                                                | GO:0008233 | 0,4 | 0,4 | 1,1 | 1,1 | 1,0 | 1,1 |
| 146525_at   | FBgn0032835 | CG16772       | -                                         | -                                                                                                 |            | 0,4 | 0,4 | 0,8 | 0,6 | 0,9 | 0,8 |
| 153656_at   | FBgn0033193 | boca          | boca                                      | -                                                                                                 |            | 0,4 | 0,4 | 0,7 | 0,7 | 0,7 | 0,8 |
| 151923_at   | FBgn0030350 | SelG          | Selenoprotein G                           | molecular_function                                                                                | GO:0003674 | 0,4 | 0,6 | 0,7 | 0,7 | 0,8 | 0,7 |
| 149768_s_at | FBgn0038034 | Cyp9f3Psi     | Cyp9f3Psi                                 | -                                                                                                 |            | 0,4 | 0,7 | 1,4 | 1,7 | 1,5 | 1,4 |
| 151393_s_at | FBgn0040924 | CG18624       | -                                         | NADH dehydrogenase activity                                                                       | GO:0003954 | 0,4 | 0,5 | 0,7 | 0,7 | 0,8 | 0,8 |
| 147327_at   | FBgn0034152 | CG8626        | Accessory gland protein 53C14a            | molecular_function                                                                                | GO:0003674 | 0,4 | 0,8 | 0,5 | 0,6 | 0,7 | 0,6 |
| 143115_at   | FBgn0000409 | Cyt-c-p       | Cytochrome c proximal                     | electron carrier activity                                                                         | GO:0009055 | 0,4 | 0,7 | 0,9 | 0,8 | 1,2 | 1,0 |
| 150121_at   | FBgn0038587 | CG7998        | Malate dehydrogenase 2                    | malate dehydrogenase activity                                                                     | GO:0016615 | 0,4 | 0,8 | 0,8 | 0,6 | 1,1 | 0,8 |
| 152362_at   | FBgn0011559 | Acp36DE       | Accessory gland protein 36DE              | hormone activity                                                                                  | GO:0005179 | 0,4 | 0,5 | 0,6 | 0,5 | 0,7 | 0,8 |
| 141342_at   | FBgn0033853 | CG6145        | -                                         | NAD+ kinase activity                                                                              | GO:0003951 | 0,4 | 0,7 | 0,7 | 1,0 | 0,8 | 0,8 |
| 143151_at   | FBgn0000592 | Est-6         | Esterase 6                                | carboxylic ester hydrolase activity                                                               | GO:0052689 | 0,4 | 0,6 | 0,6 | 0,6 | 0,6 | 0,5 |
| 142271_at   | FBgn0026314 | Ugt35b        | UDP-glycosyltransferase 35b               | glucuronosyltransferase activity                                                                  | GO:0015020 | 0,4 | 0,6 | 0,6 | 0,6 | 0,8 | 0,8 |
| 152261_at   | FBgn0027844 | CAH1          | Carbonic anhydrase 1                      | carbonate dehydratase activity                                                                    | GO:0004089 | 0,4 | 0,5 | 1,0 | 0,9 | 0,9 | 0,9 |
| 143602_at   | FBgn0010357 | betaTry       | betaTrypsin                               | serine-type endopeptidase activity                                                                | GO:0004252 | 0,4 | 0,9 | 1,1 | 1,0 | 1,5 | 1,3 |
| 144883_at   | FBgn0030311 | CG11699       | -                                         | -                                                                                                 |            | 0,4 | 0,5 | 0,7 | 0,7 | 0,9 | 0,8 |
| 147014_at   | FBgn0043470 | lambdaTry     | lambdaTry                                 | serine-type endopeptidase activity                                                                | GO:0004252 | 0,4 | 0,6 | 0,9 | 0,9 | 1,2 | 1,1 |
| 152565_at   | FBgn0038294 | CG6803        | Myofilin                                  | -                                                                                                 |            | 0,4 | 1,1 | 1,0 | 0,8 | 1,1 | 1,0 |
| 151812_at   | FBgn0016691 | Oscp          | Oligomycin sensitivity-conferring protein | hydrogen-exporting ATPase activity, phosphorylative mechanism                                     | GO:0008553 | 0,4 | 0,7 | 1,0 | 0,8 | 1,3 | 1,1 |
| 142253_at   | FBgn0039325 | CG10560       | -                                         | molecular_function                                                                                | GO:0003674 | 0,4 | 0,3 | 0,6 | 0,6 | 0,6 | 0,7 |
| 153326_at   | FBgn0031771 | CG9140        | -                                         | NADH dehydrogenase activity                                                                       | GO:0003954 | 0,4 | 0,6 | 1,0 | 0,9 | 1,1 | 1,1 |
| 153348_at   | FBgn0035600 | CG4769        | -                                         | electron transporter, transferring electrons within CoQH2-cytochrome c reductase complex activity | GO:0045153 | 0,4 | 0,6 | 0,9 | 0,7 | 1,3 | 1,0 |
| 152276_at   | FBgn0010516 | wal           | walrus                                    | electron carrier activity                                                                         | GO:0009055 | 0,4 | 0,6 | 1,2 | 1,1 | 1,3 | 1,2 |
| 154061_at   | FBgn0031907 | CG5171        | -                                         | trehalose-phosphatase activity                                                                    | GO:0004805 | 0,4 | 0,6 | 1,3 | 1,4 | 1,4 | 1,4 |
| 146532_at   | FBgn0032844 | fok           | fledgling of Klp38B                       | -                                                                                                 |            | 0,4 | 0,6 | 0,6 | 0,8 | 0,7 | 0,8 |
| 143945_at   | FBgn0020907 | Scp2          | Sarcoplasmic calcium-binding protein 2    | calcium ion binding                                                                               | GO:0005509 | 0,4 | 0,5 | 0,5 | 0,5 | 0,6 | 0,6 |
| 146174_s_at | FBgn0032273 | CG31872       | -                                         | triglyceride lipase activity                                                                      | GO:0004806 | 0,4 | 0,8 | 0,9 | 0,6 | 1,1 | 1,0 |
| 148634_at   | FBgn0036256 | l(3)neo18     | lethal (3) neo18                          | NADH dehydrogenase (ubiquinone) activity                                                          | GO:0008137 | 0,4 | 0,6 | 0,8 | 0,6 | 1,0 | 0,8 |
| 143314_at   | FBgn0003151 | Pros35        | Proteasome $\alpha 6$ subunit             | threonine-type endopeptidase activity                                                             | GO:0004298 | 0,4 | 0,5 | 0,9 | 1,1 | 1,2 | 1,1 |
| 152778_at   | FBgn0039872 | CG2196        | salty dog                                 | sodium:iodide symporter activity                                                                  | GO:0008507 | 0,4 | 0,4 | 0,7 | 0,5 | 0,8 | 0,6 |
| 153344_at   | FBgn0032833 | CG10664       | Cytochrome c oxidase subunit IV           | cytochrome-c oxidase activity                                                                     | GO:0004129 | 0,4 | 0,6 | 1,1 | 0,8 | 1,1 | 1,1 |
| 153368_at   | FBgn0026721 | fat-spondin   | fat-spondin                               | serine-type endopeptidase inhibitor activity                                                      | GO:0004867 | 0,4 | 0,5 | 1,4 | 1,9 | 1,4 | 1,4 |
| 152903_at   | FBgn0038924 | CG6028        | -                                         | catalytic activity                                                                                | GO:0003824 | 0,4 | 0,5 | 1,0 | 1,0 | 1,3 | 1,2 |
| 149345_at   | FBgn0037354 | CG12171       | -                                         | oxidoreductase activity, acting on CH-OH group of donors                                          | GO:0016614 | 0,4 | 0,5 | 2,0 | 2,5 | 1,6 | 2,0 |

|             |             |               |                                                                 |                                                               |            |     |     |     |     |     |     |
|-------------|-------------|---------------|-----------------------------------------------------------------|---------------------------------------------------------------|------------|-----|-----|-----|-----|-----|-----|
| 154206_at   | FBgn0038984 | CG5315        | Adiponectin receptor                                            | hormone binding                                               | GO:0042562 | 0,4 | 0,5 | 1,0 | 1,0 | 1,1 | 1,0 |
| 143870_at   | FBgn0016119 | ATPsyn-Cf6    | ATPase coupling factor 6                                        | hydrogen-exporting ATPase activity, phosphorylative mechanism | GO:0008553 | 0,4 | 0,7 | 1,0 | 0,6 | 1,0 | 0,9 |
| 143980_at   | FBgn0023212 | Elongin B     | Elongin B                                                       | -                                                             |            | 0,4 | 0,8 | 1,3 | 1,2 | 1,5 | 1,4 |
| 153339_at   | FBgn0039737 | CG7920        | -                                                               | 4-hydroxybutyrate CoA-transferase activity                    | GO:0008411 | 0,4 | 0,6 | 0,9 | 0,8 | 1,0 | 1,0 |
| 144246_at   | FBgn0028693 | Rpn12         | Regulatory particle non-ATPase 12                               | endopeptidase activity                                        | GO:0004175 | 0,4 | 0,4 | 0,9 | 1,0 | 1,0 | 0,9 |
| 143437_at   | FBgn0004181 | Peb           | Protein ejaculatory bulb                                        | -                                                             |            | 0,4 | 0,9 | 1,0 | 0,9 | 1,2 | 1,2 |
| 154253_at   | FBgn0003031 | pAbp          | -                                                               | mRNA binding                                                  | GO:0003729 | 0,4 | 0,9 | 1,3 | 1,0 | 1,2 | 1,5 |
| 150702_at   | FBgn0039474 | CG6283        | -                                                               | phosphatidylcholine 1-acylhydrolase activity                  | GO:0008970 | 0,4 | 0,6 | 0,5 | 0,9 | 1,0 | 0,8 |
| 143547_at   | FBgn0005585 | Crc           | Calreticulin                                                    | calcium ion binding                                           | GO:0005509 | 0,4 | 0,6 | 1,4 | 1,3 | 1,3 | 1,2 |
| 143892_at   | FBgn0017545 | RpS3A         | Ribosomal protein S3A                                           | structural constituent of ribosome                            | GO:0003735 | 0,4 | 0,5 | 0,8 | 1,0 | 0,7 | 0,7 |
| 144608_at   | FBgn0029888 | CG3192        | -                                                               | NADH dehydrogenase (ubiquinone) activity                      | GO:0008137 | 0,4 | 0,5 | 0,9 | 0,9 | 1,1 | 1,0 |
| 153283_at   | FBgn0019644 | ATPsyn-b      | ATP synthase, subunit b                                         | hydrogen-exporting ATPase activity, phosphorylative mechanism | GO:0008553 | 0,4 | 0,6 | 0,8 | 0,6 | 1,0 | 0,9 |
| 151793_at   | FBgn0035665 | CG6483        | Jonah 65Aiii                                                    | serine-type endopeptidase activity                            | GO:0004252 | 0,4 | 0,8 | 0,9 | 1,0 | 1,3 | 1,1 |
| 154574_at   | FBgn0030718 | CG9172        | -                                                               | NADH dehydrogenase (ubiquinone) activity                      | GO:0008137 | 0,4 | 0,6 | 0,7 | 0,7 | 0,9 | 0,8 |
| 146946_s_at | FBgn0033518 | Prx2540-2     | Peroxiredoxin 2540-2                                            | antioxidant activity                                          | GO:0016209 | 0,4 | 0,5 | 1,7 | 1,3 | 2,2 | 1,8 |
| 154909_at   | FBgn0005278 | M(2)21AB      | S-adenosylmethionine Synthetase                                 | methionine adenosyltransferase activity                       | GO:0004478 | 0,4 | 0,7 | 0,7 | 0,5 | 0,5 | 0,5 |
| 152019_at   | FBgn0039298 | to            | takeout                                                         | molecular_function                                            | GO:0003674 | 0,4 | 0,6 | 1,5 | 2,1 | 1,1 | 1,5 |
| 148769_at   | FBgn0036454 | CG17839       | -                                                               | -                                                             |            | 0,4 | 0,7 | 1,1 | 1,1 | 1,2 | 1,1 |
| 149312_at   | FBgn0037298 | CG2604        | -                                                               | oxidoreductase activity                                       | GO:0016491 | 0,4 | 0,6 | 0,7 | 0,8 | 0,9 | 0,8 |
| 142243_at   | FBgn0032511 | CG9306        | -                                                               | NADH dehydrogenase (ubiquinone) activity                      | GO:0008137 | 0,4 | 0,6 | 1,1 | 0,9 | 1,2 | 1,0 |
| 154334_at   | FBgn0035404 | CG12079       | NADH dehydrogenase (ubiquinone) Fe-S protein 3                  | -                                                             |            | 0,4 | 0,6 | 1,0 | 0,8 | 1,2 | 1,0 |
| 153046_at   | FBgn0014031 | Spat          | Serine pyruvate aminotransferase                                | serine-pyruvate transaminase activity                         | GO:0004760 | 0,4 | 0,5 | 1,0 | 1,5 | 1,1 | 1,3 |
| 142515_at   | FBgn0020439 | fau           | fau                                                             | -                                                             |            | 0,4 | 1,0 | 0,7 | 0,4 | 0,7 | 0,6 |
| 144219_at   | FBgn0028508 | BG:DS09217.1  | lethal (2) 35Di                                                 | NADH dehydrogenase activity                                   | GO:0003954 | 0,4 | 0,6 | 0,8 | 0,6 | 1,1 | 0,9 |
| 142457_at   | FBgn0022344 | CG10340       | -                                                               | -                                                             |            | 0,4 | 0,4 | 0,9 | 0,9 | 1,1 | 1,1 |
| 152837_at   | FBgn0039349 | CG4685        | Succinic semialdehyde dehydrogenase                             | succinate-semialdehyde dehydrogenase (NAD+) activity          | GO:0004777 | 0,4 | 0,7 | 1,0 | 1,0 | 1,2 | 1,0 |
| 154269_at   | FBgn0032927 | Acon          | Aconitase                                                       | -                                                             |            | 0,4 | 0,7 | 0,8 | 0,6 | 0,8 | 0,8 |
| 143181_at   | FBgn0001145 | Gs2           | Glutamine synthetase 2                                          | glutamate-ammonia ligase activity                             | GO:0004356 | 0,4 | 0,7 | 0,9 | 0,7 | 1,1 | 0,9 |
| 142948_at   | FBgn0016917 | Stat92E       | Signal-transducer and activator of transcription protein at 92E | DNA binding                                                   | GO:0003677 | 0,4 | 0,7 | 0,8 | 0,6 | 0,7 | 0,7 |
| 142736_s_at | FBgn0034115 | Hmgs          | HMG Coenzyme A synthase                                         | hydroxymethylglutaryl-CoA synthase activity                   | GO:0004421 | 0,4 | 0,6 | 1,0 | 2,3 | 1,4 | 1,3 |
| 146868_at   | FBgn0033384 | CG8788        | -                                                               | -                                                             |            | 0,4 | 0,6 | 1,4 | 1,3 | 1,0 | 1,0 |
| 143729_at   | FBgn0013954 | FK506-bp2     | FK506-binding protein 2                                         | FK506 binding                                                 | GO:0005528 | 0,4 | 0,5 | 0,9 | 1,3 | 1,0 | 1,0 |
| 142520_at   | FBgn0002921 | Atpalpha      | Na pump alpha subunit                                           | sodium:potassium-exchanging ATPase activity                   | GO:0005391 | 0,4 | 0,8 | 0,8 | 0,7 | 0,9 | 0,8 |
| 151535_at   | FBgn0026729 | axo           | axotactin                                                       | serine-type endopeptidase inhibitor activity                  | GO:0004867 | 0,4 | 0,6 | 0,7 | 0,6 | 0,7 | 0,6 |
| 151983_at   | FBgn0027590 | BcDNA:GH04753 | Glutathione S transferase E12                                   | glutathione transferase activity                              | GO:0004364 | 0,4 | 0,4 | 1,1 | 0,9 | 1,1 | 1,0 |
| 152919_at   | FBgn0031228 | CG3436        | -                                                               | NADH dehydrogenase activity                                   | GO:0003954 | 0,4 | 0,6 | 0,8 | 0,7 | 0,8 | 0,8 |
| 151622_at   | FBgn0037582 | CG7331        | Autophagy-specific gene 13                                      | -                                                             |            | 0,4 | 0,5 | 0,6 | 0,9 | 0,6 | 0,6 |
| 152577_at   | FBgn0031767 | kisir         | slowmo                                                          | -                                                             |            | 0,4 | 0,4 | 0,8 | 0,9 | 1,1 | 0,9 |
| 149674_at   | FBgn0037874 | CG4800        | Translationally controlled tumor protein ortholog (H. sapiens)  | guanyl-nucleotide exchange factor activity                    | GO:0005085 | 0,4 | 0,6 | 1,1 | 1,2 | 1,0 | 1,0 |
| 153309_at   | FBgn0037001 | CG6020        | -                                                               | NADH dehydrogenase (ubiquinone) activity                      | GO:0008137 | 0,4 | 0,6 | 0,7 | 0,6 | 0,8 | 0,7 |
| 152538_at   | FBgn0017539 | Scs-fp        | Succinate dehydrogenase A                                       | -                                                             |            | 0,4 | 0,8 | 0,6 | 0,6 | 0,8 | 0,7 |
| 151195_i_at | FBgn0040718 | CG15353       | -                                                               | -                                                             |            | 0,4 | 0,6 | 1,4 | 0,6 | 1,3 | 1,2 |

|             |             |             |                                               |                                                                     |            |     |     |     |     |     |     |
|-------------|-------------|-------------|-----------------------------------------------|---------------------------------------------------------------------|------------|-----|-----|-----|-----|-----|-----|
| 153450_at   | FBgn0030724 | Nipsnap     | Nipsnap                                       | molecular_function                                                  | GO:0003674 | 0,4 | 0,6 | 0,8 | 0,7 | 0,8 | 0,7 |
| 149554_at   | FBgn0037686 | CG9354      | Ribosomal protein L34b                        | structural constituent of ribosome                                  | GO:0003735 | 0,4 | 0,6 | 1,1 | 1,4 | 1,1 | 1,1 |
| 151090_f_at | FBgn0040605 | CG14236     | -                                             | -                                                                   |            | 0,4 | 0,4 | 0,8 | 0,9 | 0,7 | 0,9 |
| 142505_at   | FBgn0027910 | eIF-3p40    | Eukaryotic initiation factor 3 p40 subunit    | translation initiation factor activity                              | GO:0003743 | 0,4 | 0,6 | 1,2 | 1,5 | 1,2 | 1,2 |
| 146809_at   | FBgn0033296 | CG11669     | Maltase A7                                    | alpha-glucosidase activity                                          | GO:0004558 | 0,4 | 0,7 | 1,2 | 1,2 | 1,2 | 1,5 |
| 153260_at   | FBgn0026061 | Mipp1       | Multiple inositol polyphosphate phosphatase 1 | phosphoprotein phosphatase activity                                 | GO:0004721 | 0,4 | 0,5 | 0,9 | 0,7 | 1,0 | 1,0 |
| 149305_at   | FBgn0037290 | CG1124      | -                                             | -                                                                   |            | 0,4 | 0,7 | 0,8 | 0,8 | 0,8 | 0,8 |
| 146732_at   | FBgn0033162 | CG1707      | -                                             | lactoylglutathione lyase activity                                   | GO:0004462 | 0,4 | 0,6 | 1,1 | 1,0 | 1,2 | 1,0 |
| 154396_at   | FBgn0020766 | Aats-phe    | Phenylalanyl-tRNA synthetase                  | phenylalanine-tRNA ligase activity                                  | GO:0004826 | 0,4 | 0,6 | 1,0 | 0,9 | 1,0 | 1,0 |
| 151875_at   | FBgn0010213 | Sod2        | Superoxide dismutase 2 (Mn)                   | superoxide dismutase activity                                       | GO:0004784 | 0,4 | 0,7 | 0,9 | 0,8 | 1,2 | 1,1 |
| 153236_at   | FBgn0011768 | Fdh         | Formaldehyde dehydrogenase                    | S-(hydroxymethyl)glutathione dehydrogenase activity                 | GO:0051903 | 0,4 | 0,5 | 1,1 | 1,2 | 1,2 | 1,1 |
| 145818_s_at | FBgn0031699 | cype        | cyclope                                       | cytochrome-c oxidase activity                                       | GO:0004129 | 0,4 | 0,7 | 1,0 | 0,9 | 1,2 | 1,1 |
| 146973_at   | FBgn0033570 | CG7712      | -                                             | NADH dehydrogenase (ubiquinone) activity                            | GO:0008137 | 0,4 | 0,7 | 0,6 | 0,5 | 0,8 | 0,7 |
| 154858_at   | FBgn0038947 | sar1        | Sar1 ortholog (S. cerevisiae)                 | GTP binding                                                         | GO:0005525 | 0,4 | 0,6 | 1,2 | 0,9 | 1,3 | 1,0 |
| 147520_at   | FBgn0034474 | Obp56g      | Odorant-binding protein 56g                   | odorant binding                                                     | GO:0005549 | 0,4 | 0,6 | 1,3 | 1,3 | 1,5 | 1,4 |
| 152209_at   | FBgn0030853 | CG5703      | -                                             | NADH dehydrogenase (ubiquinone) activity                            | GO:0008137 | 0,4 | 0,6 | 1,0 | 0,9 | 1,1 | 1,0 |
| 149767_at   | FBgn0038033 | CG10097     | -                                             | fatty-acyl-CoA reductase (alcohol-forming) activity                 | GO:0080019 | 0,4 | 1,1 | 1,5 | 1,2 | 1,2 | 1,3 |
| 155112_at   | FBgn0038570 | CG7217      | Peroxioredoxin 5                              | antioxidant activity                                                | GO:0016209 | 0,4 | 0,6 | 0,9 | 0,9 | 1,1 | 1,0 |
| 149871_at   | FBgn0038198 | CG3153      | Niemann-Pick type C-2b                        | sterol binding                                                      | GO:0032934 | 0,4 | 0,7 | 0,7 | 0,7 | 0,8 | 0,8 |
| 153637_at   | FBgn0029134 | Prosbeta5   | Proteasome beta5 subunit                      | endopeptidase activity                                              | GO:0004175 | 0,4 | 0,5 | 0,8 | 0,9 | 1,0 | 0,9 |
| 150263_at   | FBgn0038801 | CG4241      | att-ORFA                                      | transmembrane transporter activity                                  | GO:0022857 | 0,4 | 0,9 | 0,9 | 0,9 | 0,8 | 0,9 |
| 153935_at   | FBgn0034277 | CG6370      | Oligosaccharide transferase Delta subunit     | dolichyl-diphosphooligosaccharide-protein glycotransferase activity | GO:0004579 | 0,4 | 0,6 | 1,1 | 1,1 | 1,0 | 0,9 |
| 149079_at   | FBgn0036919 | CG7809      | Grasp65                                       | -                                                                   |            | 0,4 | 0,6 | 1,3 | 1,2 | 1,3 | 1,1 |
| 151857_at   | FBgn0036286 | CG10616     | -                                             | molecular_function                                                  | GO:0003674 | 0,4 | 0,4 | 0,9 | 0,8 | 0,9 | 0,7 |
| 141478_at   | FBgn0004432 | Cyp1        | Cyclophilin 1                                 | peptidyl-prolyl cis-trans isomerase activity                        | GO:0003755 | 0,4 | 0,7 | 1,1 | 1,2 | 1,2 | 1,2 |
| 152675_at   | FBgn0030484 | CG1681      | Glutathione S transferase T4                  | glutathione transferase activity                                    | GO:0004364 | 0,4 | 0,7 | 1,3 | 1,3 | 1,3 | 1,5 |
| 151228_at   | FBgn0040751 | CG13018     | -                                             | -                                                                   |            | 0,4 | 0,7 | 0,7 | 0,7 | 0,9 | 0,8 |
| 144100_at   | FBgn0025827 | EG:EG0003.8 | -                                             | lysozyme activity                                                   | GO:0003796 | 0,4 | 0,4 | 1,0 | 1,2 | 1,1 | 1,4 |
| 141260_at   | FBgn0038738 | CG4572      | -                                             | serine-type carboxypeptidase activity                               | GO:0004185 | 0,4 | 0,6 | 1,1 | 1,1 | 1,2 | 1,0 |
| 141573_at   | FBgn0031363 | CG17646     | -                                             | ATPase activity, coupled to transmembrane movement of substances    | GO:0042626 | 0,4 | 0,9 | 1,1 | 1,0 | 1,1 | 0,9 |
| 155056_at   | FBgn0023174 | Prosbeta2   | Proteasome beta2 subunit                      | endopeptidase activity                                              | GO:0004175 | 0,4 | 0,5 | 1,2 | 1,5 | 1,2 | 1,2 |
| 152341_at   | FBgn0036084 | CG32061     | -                                             | -                                                                   |            | 0,4 | 0,7 | 0,7 | 0,6 | 0,8 | 0,6 |
| 155023_at   | FBgn0026428 | HDAC6       | HDAC6                                         | histone deacetylase activity                                        | GO:0004407 | 0,4 | 0,6 | 1,3 | 1,1 | 0,8 | 0,9 |
| 153504_at   | FBgn0033801 | CG33137     | -                                             | -                                                                   |            | 0,4 | 0,7 | 1,1 | 1,0 | 1,5 | 1,1 |
| 154431_at   | FBgn0016122 | Acer        | Angiotensin-converting enzyme-related         | peptidyl-dipeptidase activity                                       | GO:0008241 | 0,4 | 0,6 | 1,2 | 1,2 | 1,1 | 1,1 |
| 141536_at   | FBgn0034190 | Sply        | Sphingosine-1-phosphate lyase                 | pyridoxal phosphate binding                                         | GO:0030170 | 0,4 | 0,7 | 1,0 | 1,1 | 1,1 | 1,1 |
| 152036_at   | FBgn0027785 | NP15.6      | NP15.6                                        | molecular_function                                                  | GO:0003674 | 0,4 | 0,7 | 0,8 | 0,8 | 1,1 | 1,0 |
| 143658_at   | FBgn0011361 | mtacp1      | mitochondrial acyl carrier protein 1          | phosphopantetheine binding                                          | GO:0031177 | 0,4 | 0,6 | 0,9 | 0,6 | 1,1 | 0,8 |
| 147546_at   | FBgn0034511 | CG13422     | -                                             | carbohydrate binding                                                | GO:0030246 | 0,4 | 0,8 | 1,7 | 0,9 | 1,3 | 1,5 |
| 151802_at   | FBgn0000055 | Adh         | Alcohol dehydrogenase                         | alcohol dehydrogenase (NAD) activity                                | GO:0004022 | 0,4 | 0,9 | 1,4 | 1,2 | 1,5 | 1,4 |
| 151873_at   | FBgn0034649 | CG9865      | -                                             | transferase activity, transferring hexosyl groups                   | GO:0016758 | 0,4 | 0,7 | 0,7 | 0,7 | 0,7 | 0,6 |
| 153155_at   | FBgn0024923 | TER94       | TER94                                         | -                                                                   |            | 0,4 | 0,5 | 0,9 | 1,0 | 0,8 | 0,9 |
| 142982_at   | FBgn0015282 | Pros26.4    | Regulatory particle triple-A ATPase 2         | ATPase activity                                                     | GO:0016887 | 0,4 | 0,7 | 1,2 | 1,1 | 1,2 | 1,2 |
| 143825_at   | FBgn0015584 | Acp53Ea     | Accessory gland protein 53Ea                  | hormone activity                                                    | GO:0005179 | 0,4 | 0,7 | 0,9 | 0,7 | 0,7 | 0,7 |
| 153385_at   | FBgn0031899 | Ndae1       | Na[+]-driven anion exchanger 1                | -                                                                   |            | 0,4 | 0,7 | 1,1 | 1,4 | 0,8 | 0,9 |
| 151810_at   | FBgn0033179 | p47         | p47                                           | -                                                                   |            | 0,4 | 0,5 | 0,9 | 1,0 | 0,9 | 0,9 |

|             |             |              |                                                  |                                                                  |            |     |     |     |     |     |     |
|-------------|-------------|--------------|--------------------------------------------------|------------------------------------------------------------------|------------|-----|-----|-----|-----|-----|-----|
| 142370_at   | FBgn0023441 | fus          | fusilli                                          | mRNA binding                                                     | GO:0003729 | 0,4 | 1,3 | 1,4 | 1,4 | 1,2 | 1,3 |
| 149115_at   | FBgn0036970 | CG6289       | Serpin 77Bc                                      | serine-type endopeptidase inhibitor activity                     | GO:0004867 | 0,4 | 0,7 | 0,7 | 0,7 | 1,0 | 0,8 |
| 153820_at   | FBgn0038985 | CG6921       | james bond                                       | -                                                                |            | 0,4 | 0,6 | 0,6 | 0,6 | 0,7 | 0,6 |
| 155145_at   | FBgn0029889 | CG4094       | lethal (1) G0255                                 | -                                                                |            | 0,4 | 0,7 | 0,7 | 0,7 | 0,8 | 0,8 |
| 143463_at   | FBgn0004414 | msopa        | male-specific opa containing gene                | molecular_function                                               | GO:0003674 | 0,4 | 0,6 | 0,7 | 0,6 | 0,9 | 1,0 |
| 150225_at   | FBgn0038742 | Arc42        | Arc42                                            | acyl-CoA dehydrogenase activity                                  | GO:0003995 | 0,4 | 0,8 | 1,2 | 1,1 | 1,1 | 1,1 |
| 144473_at   | FBgn0029702 | CG15572      | -                                                | -                                                                |            | 0,4 | 0,5 | 0,8 | 0,6 | 0,8 | 0,9 |
| 147336_at   | FBgn0034162 | CG6426       | -                                                | lysozyme activity                                                | GO:0003796 | 0,4 | 0,8 | 1,9 | 2,0 | 1,9 | 2,9 |
| 154167_at   | FBgn0037728 | CG16817      | -                                                | molecular_function                                               | GO:0003674 | 0,4 | 0,7 | 0,9 | 1,1 | 1,1 | 1,1 |
| 142842_at   | FBgn0031143 | CG1532       | -                                                | -                                                                |            | 0,4 | 0,5 | 1,1 | 1,1 | 1,2 | 0,9 |
| 151016_at   | FBgn0040529 | CG9603       | -                                                | cytochrome-c oxidase activity                                    | GO:0004129 | 0,4 | 0,6 | 0,9 | 1,0 | 1,1 | 1,0 |
| 143896_at   | FBgn0017566 | ND75         | NADH:ubiquinone reductase 75kD subunit precursor | NADH dehydrogenase (ubiquinone) activity                         | GO:0008137 | 0,4 | 0,7 | 0,9 | 0,8 | 1,0 | 0,9 |
| 153392_at   | FBgn0032148 | CG18854      | -                                                | -                                                                |            | 0,4 | 0,7 | 0,8 | 0,9 | 0,9 | 0,8 |
| 153374_at   | FBgn0004646 | ogre         | optic ganglion reduced                           | gap junction channel activity                                    | GO:0005243 | 0,4 | 0,6 | 1,0 | 0,6 | 0,8 | 1,0 |
| 147328_at   | FBgn0034153 | CG15616      | Accessory gland protein 53C14b                   | molecular_function                                               | GO:0003674 | 0,4 | 0,6 | 0,8 | 0,7 | 0,8 | 0,7 |
| 150496_at   | FBgn0039172 | CG5677       | Spase 22/23-subunit                              | peptidase activity                                               | GO:0008233 | 0,4 | 0,6 | 0,7 | 0,9 | 1,0 | 0,9 |
| 143022_at   | FBgn0038376 | CG4225       | Heavy metal tolerance factor 1                   | ATPase activity, coupled to transmembrane movement of substances | GO:0042626 | 0,4 | 0,5 | 0,9 | 1,1 | 1,0 | 1,0 |
| 152159_at   | FBgn0039856 | CG1774       | -                                                | -                                                                |            | 0,4 | 0,7 | 0,6 | 0,6 | 0,8 | 0,7 |
| 152584_at   | FBgn0039697 | CG7834       | -                                                | electron carrier activity                                        | GO:0009055 | 0,4 | 0,6 | 1,0 | 0,9 | 1,0 | 1,0 |
| 148923_at   | FBgn0036675 | Lmpt         | Limpet                                           | sequence-specific DNA binding transcription factor activity      | GO:0003700 | 0,4 | 0,8 | 0,9 | 0,7 | 1,0 | 0,9 |
| 148952_at   | FBgn0036723 | CG12229      | -                                                | pyruvate kinase activity                                         | GO:0004743 | 0,4 | 0,5 | 0,6 | 0,6 | 0,6 | 0,6 |
| 149063_at   | FBgn0036891 | CG9372       | -                                                | serine-type peptidase activity                                   | GO:0008236 | 0,4 | 0,6 | 1,3 | 1,2 | 1,7 | 1,6 |
| 152488_at   | FBgn0040502 | BEST:GH10831 | -                                                | mannose binding                                                  | GO:0005537 | 0,4 | 0,9 | 1,6 | 2,0 | 2,0 | 1,8 |
| 143192_at   | FBgn0001217 | Hsc70-2      | Heat shock protein cognate 2                     | unfolded protein binding                                         | GO:0051082 | 0,4 | 0,7 | 0,6 | 0,5 | 0,7 | 0,6 |
| 147595_at   | FBgn0034576 | CG9350       | -                                                | -                                                                |            | 0,4 | 0,7 | 0,7 | 0,7 | 1,0 | 0,9 |
| 147214_at   | FBgn0033953 | CG12861      | -                                                | molecular_function                                               | GO:0003674 | 0,4 | 0,5 | 0,7 | 0,7 | 0,7 | 0,7 |
| 154374_at   | FBgn0035631 | Txl          | Thioredoxin-like                                 | disulfide oxidoreductase activity                                | GO:0015036 | 0,4 | 0,6 | 1,1 | 1,1 | 1,0 | 1,0 |
| 154275_at   | FBgn0037314 | CG12000      | Proteasome beta7 subunit                         | -                                                                |            | 0,4 | 0,6 | 0,8 | 1,0 | 0,9 | 0,8 |
| 145370_at   | FBgn0031024 | CG12233      | lethal (1) G0156                                 | magnesium ion binding                                            | GO:0000287 | 0,4 | 0,7 | 0,6 | 0,5 | 0,7 | 0,7 |
| 152965_at   | FBgn0032453 | CG6180       | -                                                | molecular_function                                               | GO:0003674 | 0,4 | 0,6 | 1,1 | 1,3 | 1,3 | 1,2 |
| 152074_at   | FBgn0010435 | emp          | epithelial membrane protein                      | scavenger receptor activity                                      | GO:0005044 | 0,4 | 0,7 | 0,9 | 0,9 | 1,1 | 0,9 |
| 145030_at   | FBgn0030519 | CG11151      | -                                                | estradiol 17-beta-dehydrogenase activity                         | GO:0004303 | 0,4 | 0,5 | 1,0 | 1,4 | 1,2 | 1,3 |
| 151667_s_at | FBgn0035906 | CG6673       | Glutathione S transferase O2                     | glutathione transferase activity                                 | GO:0004364 | 0,4 | 0,6 | 1,2 | 1,1 | 1,3 | 1,2 |
| 154175_at   | FBgn0038463 | CG3534       | -                                                | xylokinase activity                                              | GO:0004856 | 0,4 | 0,5 | 0,8 | 0,8 | 0,9 | 0,8 |
| 152508_at   | FBgn0031897 | CG13784      | -                                                | -                                                                |            | 0,4 | 0,7 | 0,7 | 1,1 | 0,7 | 0,5 |
| 148901_at   | FBgn0036642 | CG4169       | -                                                | ubiquinol-cytochrome-c reductase activity                        | GO:0008121 | 0,4 | 0,8 | 0,7 | 0,6 | 0,9 | 0,8 |
| 153728_at   | FBgn0012037 | Ance         | Angiotensin converting enzyme                    | zinc ion binding                                                 | GO:0008270 | 0,4 | 0,6 | 1,0 | 0,9 | 1,0 | 0,9 |
| 144595_at   | FBgn0029868 | CG3446       | -                                                | NADH dehydrogenase activity                                      | GO:0003954 | 0,4 | 0,7 | 0,8 | 0,8 | 1,0 | 0,9 |
| 153168_at   | FBgn0031539 | Pdsw         | Pdsw                                             | -                                                                |            | 0,4 | 0,6 | 0,9 | 0,8 | 1,1 | 0,9 |
| 153622_at   | FBgn0024811 | Crk          | Crk                                              | SH3/SH2 adaptor activity                                         | GO:0005070 | 0,4 | 0,6 | 0,7 | 0,8 | 0,7 | 0,7 |
| 153849_at   | FBgn0021979 | l(2)k09913   | lethal (2) k09913                                | molecular_function                                               | GO:0003674 | 0,5 | 0,5 | 0,7 | 0,9 | 0,9 | 0,7 |
| 142220_at   | FBgn0033367 | CG8193       | prophenoloxidase 45                              | L-DOPA monooxygenase activity                                    | GO:0036263 | 0,5 | 0,7 | 1,2 | 0,7 | 1,1 | 0,9 |
| 154218_at   | FBgn0001098 | Gdh          | Glutamate dehydrogenase                          | glutamate dehydrogenase [NAD(P)+] activity                       | GO:0004353 | 0,5 | 0,6 | 0,7 | 0,6 | 0,9 | 0,8 |
| 141768_at   | FBgn0024906 | Dak2         | Adenylate kinase-2                               | ATP binding                                                      | GO:0005524 | 0,5 | 0,5 | 0,6 | 0,7 | 0,7 | 0,6 |
| 154023_at   | FBgn0015283 | Pros54       | Regulatory particle non-ATPase 10                | endopeptidase activity                                           | GO:0004175 | 0,5 | 0,6 | 1,0 | 1,1 | 1,2 | 1,0 |
| 142590_at   | FBgn0030703 | CG9066       | membrane steroid binding protein                 | ecdysone binding                                                 | GO:0035100 | 0,5 | 0,6 | 0,7 | 0,9 | 0,9 | 0,8 |
| 142399_at   | FBgn0033631 | CG9027       | Superoxide dismutase 3                           | superoxide dismutase activity                                    | GO:0004784 | 0,5 | 0,6 | 1,0 | 1,0 | 1,4 | 1,4 |
| 145692_at   | FBgn0031505 | CG12400      | -                                                | NADH dehydrogenase (ubiquinone) activity                         | GO:0008137 | 0,5 | 0,7 | 0,8 | 0,7 | 0,8 | 0,8 |
| 151445_at   | FBgn0040985 | CG6115       | -                                                | -                                                                |            | 0,5 | 0,6 | 1,3 | 2,0 | 1,1 | 1,3 |
| 154786_at   | FBgn0038347 | CG18522      | -                                                | electron carrier activity                                        | GO:0009055 | 0,5 | 0,7 | 1,1 | 2,0 | 1,1 | 1,7 |

|           |             |               |                                            |                                                                 |            |     |     |     |     |     |     |
|-----------|-------------|---------------|--------------------------------------------|-----------------------------------------------------------------|------------|-----|-----|-----|-----|-----|-----|
| 152201_at | FBgn0027560 | Tps1          | Trehalose-6-phosphate synthase 1           | alpha,alpha-trehalose-phosphate synthase (UDP-forming) activity | GO:0003825 | 0,5 | 0,6 | 1,4 | 1,5 | 1,6 | 1,6 |
| 152556_at | FBgn0019929 | Ser7          | Ser7                                       | serine-type peptidase activity                                  | GO:0008236 | 0,5 | 0,7 | 1,1 | 1,3 | 1,2 | 1,2 |
| 145414_at | FBgn0031089 | CG9572        | -                                          | -                                                               | -          | 0,5 | 0,8 | 1,1 | 0,9 | 1,1 | 1,0 |
| 148522_at | FBgn0036085 | CG6527        | -                                          | structural molecule activity                                    | GO:0005198 | 0,5 | 0,5 | 0,6 | 0,6 | 0,6 | 0,6 |
| 145431_at | FBgn0031117 | CG1702        | Glutathione S transferase T3               | glutathione transferase activity                                | GO:0004364 | 0,5 | 0,6 | 0,9 | 1,1 | 0,8 | 0,9 |
| 143642_at | FBgn0011272 | RpL13         | Ribosomal protein L13                      | structural constituent of ribosome                              | GO:0003735 | 0,5 | 0,6 | 1,0 | 1,3 | 1,1 | 1,1 |
| 148040_at | FBgn0035334 | CG8993        | -                                          | disulfide oxidoreductase activity                               | GO:0015036 | 0,5 | 0,6 | 1,0 | 0,9 | 1,1 | 1,1 |
| 152088_at | FBgn0027579 | BcDNA:GH07066 | minotaur                                   | glycerol-3-phosphate O-acyltransferase activity                 | GO:0004366 | 0,5 | 0,7 | 1,2 | 1,1 | 1,2 | 0,9 |
| 142251_at | FBgn0000721 | for           | foraging                                   | cyclic nucleotide-dependent protein kinase activity             | GO:0004690 | 0,5 | 0,8 | 0,9 | 1,7 | 0,8 | 1,3 |
| 143949_at | FBgn0021765 | scu           | scully                                     | 3-hydroxyacyl-CoA dehydrogenase activity                        | GO:0003857 | 0,5 | 0,6 | 1,6 | 1,4 | 1,7 | 1,4 |
| 143361_at | FBgn0003471 | beta Spectrin | β Spectrin                                 | cytoskeletal protein binding                                    | GO:0008092 | 0,5 | 0,8 | 1,1 | 1,3 | 0,9 | 1,0 |
| 142165_at | FBgn0031245 | CG3625        | -                                          | -                                                               | -          | 0,5 | 0,6 | 0,5 | 0,6 | 0,6 | 0,6 |
| 152396_at | FBgn0031995 | CG8475        | -                                          | phosphorylase kinase regulator activity                         | GO:0008607 | 0,5 | 0,8 | 0,7 | 0,6 | 0,8 | 0,8 |
| 150421_at | FBgn0039049 | CG6726        | -                                          | aminoacylase activity                                           | GO:0004046 | 0,5 | 0,7 | 1,1 | 1,0 | 1,1 | 0,9 |
| 148460_at | FBgn0035982 | CG4461        | -                                          | -                                                               | -          | 0,5 | 0,6 | 0,7 | 0,6 | 0,9 | 0,8 |
| 141585_at | FBgn0031187 | CG14619       | -                                          | ubiquitin-specific protease activity                            | GO:0004843 | 0,5 | 0,7 | 0,8 | 0,7 | 0,7 | 0,7 |
| 146660_at | FBgn0033047 | CG7882        | -                                          | glucose transmembrane transporter activity                      | GO:0005355 | 0,5 | 0,6 | 0,9 | 0,7 | 1,1 | 0,8 |
| 151349_at | FBgn0040875 | sun           | stunted                                    | proton-transporting ATP synthase activity                       | GO:0046933 | 0,5 | 0,8 | 0,6 | 0,5 | 0,9 | 0,8 |
| 147765_at | FBgn0034848 | CG30409       | Ribose-5-phosphate isomerase               | ribose-5-phosphate isomerase activity                           | GO:0004751 | 0,5 | 0,5 | 0,8 | 0,8 | 0,9 | 0,7 |
| 150682_at | FBgn0039452 | CG14245       | -                                          | chitin binding                                                  | GO:0008061 | 0,5 | 0,7 | 0,7 | 1,0 | 1,0 | 1,0 |
| 152332_at | FBgn0030251 | CG2145        | -                                          | serine-type peptidase activity                                  | GO:0008236 | 0,5 | 0,7 | 1,5 | 1,2 | 1,4 | 1,4 |
| 147237_at | FBgn0034003 | Hex-C         | Hexokinase C                               | fructokinase activity                                           | GO:0008865 | 0,5 | 0,6 | 1,3 | 1,0 | 1,2 | 1,1 |
| 147378_at | FBgn0034245 | CG14482       | -                                          | ubiquinol-cytochrome-c reductase activity                       | GO:0008121 | 0,5 | 0,8 | 0,7 | 0,6 | 0,8 | 0,8 |
| 143639_at | FBgn0011225 | jar           | jaguar                                     | ATPase activity, coupled                                        | GO:0042623 | 0,5 | 0,6 | 0,8 | 1,3 | 1,0 | 1,1 |
| 152744_at | FBgn0035032 | CG4692        | -                                          | hydrogen-exporting ATPase activity, phosphorylative mechanism   | GO:0008553 | 0,5 | 0,5 | 1,0 | 0,7 | 1,3 | 1,0 |
| 151853_at | FBgn0027610 | BcDNA:GH02431 | Dicarboxylate carrier 1                    | dicarboxylic acid transmembrane transporter activity            | GO:0005310 | 0,5 | 0,6 | 1,1 | 1,0 | 1,0 | 1,0 |
| 143265_at | FBgn0002773 | Mlc2          | Myosin light chain 2                       | microfilament motor activity                                    | GO:0000146 | 0,5 | 0,9 | 0,8 | 0,5 | 1,1 | 0,9 |
| 144663_at | FBgn0029971 | CG18624       | -                                          | NADH dehydrogenase activity                                     | GO:0003954 | 0,5 | 0,7 | 0,9 | 0,6 | 0,9 | 0,9 |
| 147789_at | FBgn0034877 | CG17280       | levy                                       | cytochrome-c oxidase activity                                   | GO:0004129 | 0,5 | 0,7 | 0,8 | 0,7 | 1,0 | 0,9 |
| 152323_at | FBgn0037744 | CG8417        | -                                          | mannose-6-phosphate isomerase activity                          | GO:0004476 | 0,5 | 0,6 | 1,0 | 0,9 | 0,9 | 1,0 |
| 152816_at | FBgn0029990 | CG2233        | -                                          | -                                                               | -          | 0,5 | 0,8 | 1,4 | 1,4 | 1,3 | 1,4 |
| 150300_at | FBgn0038863 | CG5802        | medial glomeruli                           | UDP-galactose transmembrane transporter activity                | GO:0005459 | 0,5 | 0,6 | 1,0 | 1,0 | 0,9 | 0,8 |
| 143739_at | FBgn0014002 | Pdi           | Protein disulfide isomerase                | protein disulfide isomerase activity                            | GO:0003756 | 0,5 | 0,7 | 1,0 | 1,1 | 1,0 | 0,9 |
| 155091_at | FBgn0015766 | Msr-110       | Msr-110                                    | molecular function                                              | GO:0003674 | 0,5 | 0,6 | 0,9 | 1,0 | 0,8 | 0,8 |
| 154256_at | FBgn0000173 | ben           | bendless                                   | ubiquitin-protein ligase activity                               | GO:0004842 | 0,5 | 0,6 | 0,8 | 0,6 | 0,8 | 0,8 |
| 153611_at | FBgn0026170 | smt3          | smt3                                       | -                                                               | -          | 0,5 | 0,7 | 1,0 | 1,1 | 1,0 | 1,1 |
| 142971_at | FBgn0003638 | EG:BACR7A4.10 | suppressor of white-apricot                | RNA binding                                                     | GO:0003723 | 0,5 | 0,6 | 0,8 | 0,8 | 0,9 | 0,7 |
| 151926_at | FBgn0039348 | CG4673        | Npl4 ortholog                              | structural constituent of nuclear pore                          | GO:0017056 | 0,5 | 0,8 | 0,8 | 0,8 | 0,9 | 0,8 |
| 152312_at | FBgn0034048 | l(2)k05713    | Glycerophosphate oxidase-1                 | glycerol-3-phosphate dehydrogenase activity                     | GO:0004368 | 0,5 | 0,5 | 1,0 | 0,7 | 1,0 | 1,1 |
| 150643_at | FBgn0039406 | CG6090        | Ribosomal protein L34a                     | structural constituent of ribosome                              | GO:0003735 | 0,5 | 0,5 | 1,0 | 1,0 | 0,9 | 0,9 |
| 151121_at | FBgn0040636 | CG13255       | -                                          | -                                                               | -          | 0,5 | 0,6 | 1,2 | 1,3 | 1,2 | 1,4 |
| 143415_at | FBgn0004028 | wupA          | wings up A                                 | actin binding                                                   | GO:0003779 | 0,5 | 0,8 | 0,8 | 0,5 | 1,0 | 0,8 |
| 146273_at | FBgn0032413 | CG16997       | Phaedra 2                                  | serine-type endopeptidase activity                              | GO:0004252 | 0,5 | 0,6 | 1,0 | 0,9 | 1,0 | 1,1 |
| 151841_at | FBgn0033320 | CG8586        | -                                          | serine-type endopeptidase activity                              | GO:0004252 | 0,5 | 0,7 | 2,1 | 2,5 | 2,1 | 1,8 |
| 143631_at | FBgn0010638 | Sec61beta     | Sec61 beta subunit                         | protein transporter activity                                    | GO:0008565 | 0,5 | 0,5 | 0,9 | 0,9 | 1,0 | 0,7 |
| 146321_at | FBgn0032492 | Prosalpha6T   | Proteasome alpha6 subunit, Testis-specific | endopeptidase activity                                          | GO:0004175 | 0,5 | 0,7 | 0,5 | 0,5 | 0,5 | 0,6 |
| 152603_at | FBgn0030731 | CG3415        | peroxisomal Multifunctional enzyme type 2  | enoyl-CoA hydratase activity                                    | GO:0004300 | 0,5 | 0,6 | 1,2 | 1,4 | 1,2 | 1,3 |

|           |             |               |                                                       |                                                                    |            |     |     |     |     |     |     |
|-----------|-------------|---------------|-------------------------------------------------------|--------------------------------------------------------------------|------------|-----|-----|-----|-----|-----|-----|
| 154662_at | FBgn0032222 | CG5037        | -                                                     | protoheme IX farnesyltransferase activity                          | GO:0008495 | 0,5 | 0,7 | 0,7 | 0,7 | 0,8 | 0,7 |
| 142523_at | FBgn0038181 | CG9297        | -                                                     | calcium ion binding                                                | GO:0005509 | 0,5 | 1,2 | 0,8 | 0,3 | 1,1 | 0,8 |
| 153098_at | FBgn0039102 | CG16705       | Spatzle-Processing Enzyme                             | serine-type endopeptidase activity                                 | GO:0004252 | 0,5 | 0,6 | 1,9 | 1,8 | 1,5 | 1,6 |
| 153279_at | FBgn0027912 | Tapdelta      | Translocon-associated protein delta                   | -                                                                  |            | 0,5 | 0,5 | 1,0 | 0,9 | 0,9 | 0,9 |
| 146407_at | FBgn0032642 | CG5110        | -                                                     | SH3/SH2 adaptor activity                                           | GO:0005070 | 0,5 | 0,4 | 0,9 | 1,1 | 1,0 | 1,0 |
| 141547_at | FBgn0004057 | Zw            | Zwischenferment                                       | glucose-6-phosphate dehydrogenase activity                         | GO:0004345 | 0,5 | 0,6 | 1,1 | 0,9 | 1,2 | 1,0 |
| 142786_at | FBgn0037530 | CG2943        | -                                                     | -                                                                  |            | 0,5 | 0,6 | 0,8 | 1,0 | 0,9 | 1,0 |
| 153541_at | FBgn0032159 | BEST:CK01296  | -                                                     | -                                                                  |            | 0,5 | 0,6 | 1,2 | 1,1 | 1,3 | 1,1 |
| 149334_at | FBgn0037328 | CG2099        | Ribosomal protein L35A                                | structural constituent of ribosome                                 | GO:0003735 | 0,5 | 0,7 | 1,1 | 1,3 | 1,2 | 1,1 |
| 144259_at | FBgn0028847 | BG:DS08249.3  | -                                                     | protein tag                                                        | GO:0031386 | 0,5 | 0,8 | 1,0 | 0,8 | 0,8 | 0,9 |
| 153040_at | FBgn0033529 | CG17765       | -                                                     | calcium ion binding                                                | GO:0005509 | 0,5 | 0,6 | 0,9 | 1,1 | 0,8 | 1,0 |
| 146767_at | FBgn0033221 | CG12825       | -                                                     | -                                                                  |            | 0,5 | 0,5 | 1,4 | 1,8 | 1,6 | 1,7 |
| 153026_at | FBgn0033383 | CG8057        | alicorn                                               | -                                                                  |            | 0,5 | 0,7 | 0,8 | 0,9 | 0,8 | 0,9 |
| 144350_at | FBgn0029533 | EG:BACR19J1.2 | -                                                     | tricarboxylate secondary active transmembrane transporter activity | GO:0005371 | 0,5 | 0,7 | 1,0 | 1,0 | 1,1 | 1,1 |
| 142494_at | FBgn0003360 | sesB          | stress-sensitive B                                    | ATP:ADP antiporter activity                                        | GO:0005471 | 0,5 | 0,7 | 0,7 | 0,6 | 0,8 | 0,8 |
| 151522_at | FBgn0039493 | Mdh           | Malic enzyme b                                        | malate dehydrogenase (decarboxylating) (NAD+) activity             | GO:0004471 | 0,5 | 0,8 | 0,6 | 0,6 | 0,6 | 0,6 |
| 153847_at | FBgn0037112 | BcDNA:GH08902 | -                                                     | carbohydrate binding                                               | GO:0030246 | 0,5 | 0,6 | 1,3 | 1,2 | 1,4 | 1,1 |
| 153828_at | FBgn0032136 | CG15828       | Apolipoprotein lipid transfer particle                | lipid binding                                                      | GO:0008289 | 0,5 | 0,9 | 1,3 | 3,5 | 0,9 | 1,5 |
| 152086_at | FBgn0036106 | CG6409        | -                                                     | -                                                                  |            | 0,5 | 0,8 | 1,5 | 1,8 | 1,5 | 1,5 |
| 153289_at | FBgn0034089 | CG44243       | -                                                     | lipoyltransferase activity                                         | GO:0017118 | 0,5 | 0,8 | 0,9 | 0,9 | 0,9 | 0,8 |
| 152350_at | FBgn0027547 | BcDNA:GH11112 | -                                                     | -                                                                  |            | 0,5 | 0,7 | 0,9 | 1,0 | 1,0 | 1,0 |
| 152003_at | FBgn0036857 | CG9629        | -                                                     | aldehyde dehydrogenase (NAD) activity                              | GO:0004029 | 0,5 | 0,6 | 0,7 | 0,6 | 1,0 | 0,8 |
| 142303_at | FBgn0039493 | Mdh           | Malic enzyme b                                        | malate dehydrogenase (decarboxylating) (NAD+) activity             | GO:0004471 | 0,5 | 0,7 | 0,9 | 0,8 | 0,9 | 0,9 |
| 152866_at | FBgn0031689 | Cyp28d1       | Cyp28d1                                               | electron carrier activity                                          | GO:0009055 | 0,5 | 0,6 | 1,0 | 1,2 | 1,4 | 1,2 |
| 150719_at | FBgn0039498 | CG17991       | -                                                     | zinc ion binding                                                   | GO:0008270 | 0,5 | 1,1 | 0,7 | 0,8 | 0,9 | 0,7 |
| 143877_at | FBgn0016687 | Nurf-38       | Nucleosome remodeling factor - 38kD                   | inorganic diphosphatase activity                                   | GO:0004427 | 0,5 | 0,5 | 1,5 | 1,4 | 1,4 | 1,5 |
| 143625_at | FBgn0010426 | Vha14         | Vacuolar H+ ATPase 14kD subunit 1                     | proton-transporting ATPase activity                                | GO:0046961 | 0,5 | 0,6 | 0,9 | 1,1 | 0,9 | 1,1 |
| 153468_at | FBgn0015776 | Nrv1          | nervana 1                                             | sodium:potassium-exchanging ATPase activity                        | GO:0005391 | 0,5 | 0,7 | 0,7 | 0,8 | 0,8 | 0,6 |
| 147881_at | FBgn0035046 | CG3683        | NADH dehydrogenase (ubiquinone) 1 alpha subcomplex, 8 | NADH dehydrogenase (ubiquinone) activity                           | GO:0008137 | 0,5 | 0,7 | 0,8 | 0,7 | 1,1 | 0,9 |
| 152673_at | FBgn0025680 | DmCRY1        | cryptochrome                                          | G-protein coupled photoreceptor activity                           | GO:0008020 | 0,5 | 0,6 | 1,4 | 1,2 | 1,5 | 1,3 |
| 141370_at | FBgn0027945 | ppl           | pumpless                                              | -                                                                  |            | 0,5 | 0,6 | 0,9 | 0,8 | 1,1 | 0,9 |
| 154383_at | FBgn0032721 | CG10602       | -                                                     | leukotriene-A4 hydrolase activity                                  | GO:0004463 | 0,5 | 0,6 | 0,8 | 0,9 | 0,7 | 0,8 |
| 142335_at | FBgn0037063 | CG9391        | -                                                     | inositol monophosphate 1-phosphatase activity                      | GO:0008934 | 0,5 | 0,6 | 0,7 | 0,9 | 1,1 | 1,0 |
| 152593_at | FBgn0038938 | CG7084        | -                                                     | secondary active organic cation transmembrane transporter activity | GO:0008513 | 0,5 | 0,7 | 1,1 | 0,9 | 1,2 | 1,1 |
| 141484_at | FBgn0035588 | CG10672       | -                                                     | oxidoreductase activity, acting on CH-OH group of donors           | GO:0016614 | 0,5 | 0,6 | 0,8 | 0,8 | 0,8 | 0,8 |
| 155074_at | FBgn0038256 | CG7530        | -                                                     | -                                                                  |            | 0,5 | 0,8 | 1,0 | 0,9 | 0,8 | 0,8 |
| 146792_at | FBgn0033268 | Obp44a        | Odorant-binding protein 44a                           | odorant binding                                                    | GO:0005549 | 0,5 | 0,6 | 1,4 | 1,1 | 1,4 | 1,4 |
| 146305_at | FBgn0032463 | Vha68-2       | Vacuolar H+ ATPase 68 kDa subunit 2                   | ATP binding                                                        | GO:0005524 | 0,5 | 0,6 | 0,8 | 0,9 | 0,9 | 0,8 |
| 143899_at | FBgn0019624 | CoVa          | Cytochrome c oxidase subunit Va                       | cytochrome-c oxidase activity                                      | GO:0004129 | 0,5 | 0,8 | 0,9 | 0,7 | 1,2 | 1,0 |
| 144806_at | FBgn0030209 | CG32687       | -                                                     | -                                                                  |            | 0,5 | 0,7 | 1,1 | 1,5 | 1,2 | 1,3 |
| 150834_at | FBgn0039682 | Obp99c        | Odorant-binding protein 99c                           | odorant binding                                                    | GO:0005549 | 0,5 | 0,6 | 1,8 | 2,1 | 1,7 | 1,7 |
| 150467_at | FBgn0039112 | CG10219       | -                                                     | succinate dehydrogenase (ubiquinone) activity                      | GO:0008177 | 0,5 | 0,6 | 0,9 | 0,8 | 1,3 | 1,1 |

|           |             |          |                                                              |                                                                  |            |     |     |     |     |     |     |
|-----------|-------------|----------|--------------------------------------------------------------|------------------------------------------------------------------|------------|-----|-----|-----|-----|-----|-----|
| 153574_at | FBgn0027095 | ARP-like | Mesencephalic astrocyte-derived neurotrophic factor ortholog | -                                                                |            | 0,5 | 0,4 | 0,9 | 1,0 | 0,9 | 0,7 |
| 152238_at | FBgn0036203 | CG6004   | Mucin 68D                                                    | structural constituent of peritrophic membrane                   | GO:0016490 | 0,5 | 0,4 | 0,6 | 0,6 | 0,5 | 0,5 |
| 150955_at | FBgn0039873 | CG2191   | Sodium-dependent multivitamin transporter                    | sodium-dependent multivitamin transmembrane transporter activity | GO:0008523 | 0,6 | 0,4 | 0,6 | 0,6 | 0,6 | 0,5 |

FHV specific

|             |             |               |                                                       |                                          |            |     |     |     |     |     |     |
|-------------|-------------|---------------|-------------------------------------------------------|------------------------------------------|------------|-----|-----|-----|-----|-----|-----|
| 143096_f_at | FBgn0000276 | Cecropin A1   | Cecropin A1                                           | molecular function                       | GO:0003674 | 1,1 | 1,2 | 0,4 | 0,8 | 0,6 | 0,5 |
| 142675_at   | FBgn0027512 | BcDNA:LD22087 | -                                                     | ubiquitin-protein ligase activity        | GO:0004842 | 1,0 | 1,2 | 0,4 | 0,6 | 0,6 | 0,6 |
| 154208_at   | FBgn0029820 | CG16721       | -                                                     | -                                        |            | 0,8 | 0,8 | 0,4 | 0,6 | 0,6 | 0,7 |
| 146132_at   | FBgn0032200 | CG5676        | -                                                     | -                                        |            | 0,6 | 0,7 | 0,4 | 0,7 | 0,7 | 0,7 |
| 149307_at   | FBgn0037292 | CG2022        | -                                                     | -                                        |            | 0,6 | 0,6 | 0,4 | 0,4 | 0,6 | 0,5 |
| 145983_at   | FBgn0031946 | CG7164        | -                                                     | -                                        |            | 0,7 | 0,8 | 0,4 | 0,4 | 0,5 | 0,6 |
| 152645_at   | FBgn0031690 | CG7742        | -                                                     | Rab GTPase activator activity            | GO:0005097 | 1,0 | 0,9 | 0,4 | 0,5 | 0,6 | 0,5 |
| 151605_at   | FBgn0038181 | CG9297        | -                                                     | calcium ion binding                      | GO:0005509 | 0,9 | 1,4 | 0,4 | 0,3 | 0,6 | 0,6 |
| 152898_at   | FBgn0011716 | spdo          | sanpodo                                               | protein binding                          | GO:0005515 | 0,6 | 0,8 | 0,5 | 0,5 | 0,6 | 0,5 |
| 145643_at   | FBgn0031427 | CG34447       | -                                                     | lipase activity                          | GO:0016298 | 0,7 | 0,9 | 0,5 | 0,5 | 0,7 | 0,6 |
| 152906_at   | FBgn0037375 | CG1193        | katanin p60-like 1                                    | ATPase activity                          | GO:0016887 | 1,2 | 1,0 | 0,5 | 0,5 | 0,5 | 0,5 |
| 147604_at   | FBgn0034595 | CG15657       | -                                                     | -                                        |            | 0,8 | 1,0 | 0,5 | 0,5 | 0,5 | 0,6 |
| 143902_at   | FBgn0019828 | dj            | don juan                                              | DNA binding                              | GO:0003677 | 0,8 | 0,9 | 0,5 | 0,6 | 0,5 | 0,5 |
| 151989_at   | FBgn0031645 | CG3036        | -                                                     | sodium:phosphate symporter activity      | GO:0005436 | 0,4 | 0,7 | 0,5 | 0,6 | 0,7 | 0,7 |
| 151424_at   | FBgn0040963 | CG18662       | -                                                     | -                                        |            | 1,0 | 0,9 | 0,5 | 0,4 | 0,6 | 0,6 |
| 146803_at   | FBgn0033284 | CG30362       | borrelly                                              | -                                        |            | 0,6 | 0,7 | 0,5 | 0,4 | 0,5 | 0,6 |
| 146241_at   | FBgn0032360 | CG14926       | -                                                     | -                                        |            | 1,0 | 1,0 | 0,5 | 0,5 | 0,7 | 0,5 |
| 152795_at   | FBgn0038225 | CG8489        | scotti                                                | molecular function                       | GO:0003674 | 1,0 | 1,1 | 0,5 | 0,4 | 0,5 | 0,5 |
| 144613_at   | FBgn0029896 | CG3168        | -                                                     | transmembrane transporter activity       | GO:0022857 | 0,8 | 0,9 | 0,5 | 0,6 | 0,6 | 0,5 |
| 147951_at   | FBgn0035176 | CG13905       | -                                                     | -                                        |            | 2,7 | 2,0 | 0,5 | 1,8 | 1,5 | 1,1 |
| 152314_at   | FBgn0036512 | CG16979       | -                                                     | thiolester hydrolase activity            | GO:0016790 | 0,7 | 0,9 | 0,5 | 0,5 | 0,6 | 0,5 |
| 143071_at   | FBgn0000094 | Anp           | Andropin                                              | -                                        |            | 0,8 | 0,7 | 0,5 | 0,5 | 0,5 | 0,6 |
| 149622_at   | FBgn0037799 | CG34107       | -                                                     | -                                        |            | 0,8 | 0,7 | 0,5 | 0,5 | 0,5 | 0,5 |
| 152516_at   | FBgn0037939 | CG14718       | -                                                     | mRNA binding                             | GO:0003729 | 0,8 | 0,9 | 0,5 | 0,4 | 0,5 | 0,5 |
| 147297_at   | FBgn0034105 | CG7755        | -                                                     | isocitrate dehydrogenase (NAD+) activity | GO:0004449 | 0,6 | 0,8 | 0,6 | 0,5 | 0,6 | 0,5 |
| 143061_at   | FBgn0000047 | Actin 88F     | Actin 88F                                             | structural constituent of cytoskeleton   | GO:0005200 | 0,5 | 0,6 | 0,6 | 0,2 | 1,1 | 0,7 |
| 151182_at   | FBgn0040705 | CG15434       | -                                                     | NADH dehydrogenase activity              | GO:0003954 | 0,7 | 1,0 | 0,6 | 0,4 | 0,8 | 0,7 |
| 148613_at   | FBgn0036218 | CG14128       | -                                                     | -                                        |            | 0,6 | 0,8 | 0,6 | 0,5 | 0,7 | 0,6 |
| 152409_at   | FBgn0029753 | CG4198        | -                                                     | -                                        |            | 0,7 | 0,8 | 0,6 | 0,4 | 0,6 | 0,6 |
| 148138_at   | FBgn0035483 | CG1134        | Mitochondrial E3 ubiquitin protein ligase 1 homologue | zinc ion binding                         | GO:0008270 | 0,8 | 0,9 | 0,6 | 0,5 | 0,6 | 0,6 |
| 152131_at   | FBgn0037355 | CG31546       | -                                                     | oxidoreductase activity                  |            | 0,9 | 1,0 | 0,6 | 0,5 | 0,6 | 0,7 |
| 143604_r_at | FBgn0010359 | gammaTry      | gammaTrypsin                                          | serine-type endopeptidase activity       | GO:0004252 | 0,5 | 0,5 | 0,6 | 0,5 | 0,9 | 0,8 |
| 152483_at   | FBgn0035915 | CG6372        | Sperm-Leucylaminopeptidase 1                          | aminopeptidase activity                  | GO:0004177 | 0,7 | 0,9 | 0,6 | 0,5 | 0,7 | 0,6 |
| 143769_at   | FBgn0014863 | Mlp84B        | Muscle LIM protein at 84B                             | structural constituent of muscle         | GO:0008307 | 0,8 | 1,1 | 0,6 | 0,4 | 0,8 | 0,6 |
| 153027_at   | FBgn0035598 | CG4669        | -                                                     | -                                        |            | 0,8 | 0,9 | 0,6 | 0,4 | 0,7 | 0,6 |
| 149181_at   | FBgn0037086 | CG7202        | -                                                     | -                                        |            | 0,8 | 0,9 | 0,7 | 0,5 | 0,8 | 0,7 |
| 153024_at   | FBgn0004551 | Ca-P60A       | Calcium ATPase at 60A                                 | calcium-transporting ATPase activity     | GO:0005388 | 0,5 | 0,9 | 0,7 | 0,5 | 0,8 | 0,8 |
| 152610_at   | FBgn0036611 | CG33060       | -                                                     | -                                        |            | 0,8 | 0,8 | 0,8 | 0,4 | 1,7 | 1,3 |
| 152555_at   | FBgn0003149 | Pm            | Paramyosin                                            | structural constituent of muscle         | GO:0008307 | 0,6 | 0,6 | 0,8 | 0,3 | 0,9 | 0,7 |

SINV specific

|             |             |         |                    |                                       |            |     |     |     |     |     |     |
|-------------|-------------|---------|--------------------|---------------------------------------|------------|-----|-----|-----|-----|-----|-----|
| 151241_f_at | FBgn0040767 | CG13233 | -                  | -                                     |            | 1,1 | 1,1 | 0,5 | 0,6 | 0,4 | 0,5 |
| 153019_at   | FBgn0031294 | ia2     | IA-2 ortholog      | protein tyrosine phosphatase activity | GO:0004725 | 0,7 | 1,3 | 0,5 | 0,7 | 0,4 | 0,5 |
| 148499_at   | FBgn0036056 | CG6709  | -                  | -                                     |            | 0,6 | 0,7 | 0,5 | 0,6 | 0,5 | 0,7 |
| 147980_at   | FBgn0028567 | robl62A | robl62A            | ATPase activity, coupled              | GO:0042623 | 0,8 | 1,0 | 0,7 | 0,6 | 0,5 | 0,7 |
| 153703_at   | FBgn0000575 | emc     | extra macrochaetae | transcription corepressor activity    | GO:0003714 | 0,7 | 1,1 | 0,5 | 0,8 | 0,5 | 0,6 |
| 152495_at   | FBgn0035716 | CG32392 | -                  | microtubule binding                   | GO:0008017 | 0,8 | 1,1 | 0,5 | 0,5 | 0,5 | 0,5 |



|           |             |          |                                          |                                            |            |     |     |     |     |     |     |
|-----------|-------------|----------|------------------------------------------|--------------------------------------------|------------|-----|-----|-----|-----|-----|-----|
| 153256_at | FBgn0029870 | Marf     | Mitochondrial assembly regulatory factor | GTP binding                                | GO:0005525 | 0,7 | 1,0 | 0,6 | 0,7 | 0,5 | 0,5 |
| 151334_at | FBgn0040859 | CR32658  | -                                        | -                                          |            | 0,9 | 0,9 | 0,6 | 0,5 | 0,5 | 0,5 |
| 148919_at | FBgn0036669 | CG13030  | sina homologue                           | ubiquitin-protein ligase activity          | GO:0004842 | 0,9 | 1,0 | 0,6 | 0,6 | 0,5 | 0,5 |
| 150222_at | FBgn0038739 | CG4686   | -                                        | -                                          |            | 0,6 | 0,7 | 0,5 | 0,6 | 0,6 | 0,4 |
| 142482_at | FBgn0020503 | CLIP-190 | Cytoplasmic linker protein 190           | microtubule binding                        | GO:0008017 | 0,8 | 0,9 | 0,5 | 0,6 | 0,6 | 0,5 |
| 150440_at | FBgn0039071 | CG4434   | -                                        | glutamate dehydrogenase [NAD(P)+] activity | GO:0004353 | 0,7 | 0,8 | 0,5 | 0,6 | 0,6 | 0,4 |
| 154207_at | FBgn0033734 | CG8520   | -                                        | ATPase activity                            | GO:0016887 | 0,6 | 0,8 | 0,5 | 0,6 | 0,6 | 0,5 |
| 143770_at | FBgn0014865 | Mtk      | Metchnikowin                             | -                                          |            | 2,7 | 3,0 | 0,9 | 1,8 | 0,7 | 0,4 |
| 145652_at | FBgn0031439 | CG15394  | -                                        | -                                          |            | 1,1 | 0,8 | 0,6 | 0,9 | 0,8 | 0,5 |

**Table S2.** List of tissue specific genes repressed by DCV

| Probe number                          | Gene name | Synonymus                                      | Tris/DCV ratio | Putative function                                          | Key words                                                                   |
|---------------------------------------|-----------|------------------------------------------------|----------------|------------------------------------------------------------|-----------------------------------------------------------------------------|
| <b>Head specific</b>                  |           |                                                |                |                                                            |                                                                             |
| 151817_at                             | CG8329    |                                                | 0,2            | proteolysis                                                | serine-type endopeptidase activity                                          |
| 152604_at                             | CG3088    |                                                | 0,3            | proteolysis                                                | serine-type endopeptidase activity                                          |
| <b>Hindgut specific</b>               |           |                                                |                |                                                            |                                                                             |
| 145253_at                             | CG12990   |                                                | 0,1            |                                                            | transferase activity, transferring acyl groups other than amino-acyl groups |
| <b>Male accessory glands specific</b> |           |                                                |                |                                                            |                                                                             |
| 143463_at                             | msopa     | male-specific opa containing gene              | 0,4            | defense response                                           | extracellular space                                                         |
| 147328_at                             | Acp53C14b | Accessory gland protein 53C14b                 | 0,4            |                                                            | extracellular space                                                         |
| 147327_at                             | Acp53C14a | Accessory gland protein 53C14a                 | 0,4            |                                                            | extracellular space                                                         |
| 143825_at                             | Acp53Ea   | Accessory gland protein 53Ea                   | 0,4            | sperm competition                                          | extracellular space                                                         |
| 152362_at                             | Acp36DE   | Accessory gland protein 36DE                   | 0,4            | sperm competition                                          | extracellular space                                                         |
| 145253_at                             | Spn77Bb   | Serpin 77Bb                                    | 0,3            | proteolysis                                                | serine-type endopeptidase inhibitor activity                                |
| 149115_at                             | Spn77Bc   | Serpin 77Bc                                    | 0,4            | proteolysis                                                | serine-type endopeptidase inhibitor activity                                |
| 146175_at                             | CG17097   |                                                | 0,3            | lipase activity                                            | lipid metabolic process                                                     |
| <b>Testis specific</b>                |           |                                                |                |                                                            |                                                                             |
| 148952_at                             | CG12229   |                                                | 0,4            | glycolysis                                                 | pyruvate kinase activity                                                    |
| 150719_at                             | CG17991   |                                                | 0,5            | protein polyubiquitination                                 | ubiquitin-protein ligase activity                                           |
| 143192_at                             | Hsc70-2   | Heat shock protein cognate 2                   | 0,4            | protein folding                                            | unfolded protein binding                                                    |
| 146321_at                             | Prosa6T   | Proteasome $\alpha$ 6 subunit, Testis-specific | 0,5            | defense response to Gram-negative bacterium                | endopeptidase activity                                                      |
| 148522_at                             | CG6527    |                                                | 0,5            | -                                                          | structural molecule activity                                                |
| 144473_at                             | CG15572   |                                                | 0,4            | -                                                          | -                                                                           |
| 146184_at                             | CG17108   |                                                | 0,3            | -                                                          | -                                                                           |
| 147214_at                             | CG12861   |                                                | 0,4            | -                                                          | -                                                                           |
| <b>Tubule specific</b>                |           |                                                |                |                                                            |                                                                             |
| 150206_at                             | CG17752   |                                                | 0,0            | transmembrane transport                                    | secondary active organic cation transmembrane transporter activity          |
| 145698_at                             | CG15406   |                                                | 0,3            | transmembrane transport                                    | fructose transmembrane transporter activity                                 |
| 150955_at                             | Smvt      | Sodium-dependent multivitamin transporter      | 0,4            | transmembrane transport                                    | sodium-dependent multivitamin transmembrane transporter activity            |
| 152593_at                             | CG7084    |                                                | 0,5            | transmembrane transport, neurogenesis                      | secondary active organic cation transmembrane transporter activity          |
| 146660_at                             | CG7882    |                                                | 0,5            | transmembrane transport                                    | glucose transmembrane transporter activity                                  |
| 152778_at                             | salt      | salty dog                                      | 0,4            | transmembrane transport                                    | sodium:iodide symporter activity                                            |
| 151882_at                             | CG3270    |                                                | 0,3            | oxidation-reduction process                                | oxidoreductase activity                                                     |
| 154343_at                             | CG9509    |                                                | 0,3            | oxidation-reduction process, ecdysteroid metabolic process | oxidoreductase activity                                                     |
| 150421_at                             | CG6726    |                                                | 0,5            | cellular amino acid metabolic process                      | aminoacylase activity                                                       |
| 148259_at                             | CG6602    |                                                | 0,2            | -                                                          | -                                                                           |

| Midgut specific |          |                                            |     |                                              |                                      |
|-----------------|----------|--------------------------------------------|-----|----------------------------------------------|--------------------------------------|
| 143660_at       | θTry     | θTrypsin                                   | 0,1 | proteolysis                                  | serine-type endopeptidase activity   |
| 147014_at       | λTry     | λTrypsin                                   | 0,4 | proteolysis                                  | serine-type endopeptidase activity   |
| 148254_at       | Jon65Aii | Jonah 65Aii                                | 0,1 | proteolysis                                  | serine-type endopeptidase activity   |
| 143341_at       | Jon99Ci  | Jonah 99Ci, Ser99Dc                        | 0,0 | proteolysis                                  | serine-type endopeptidase activity   |
| 146273_at       | Phae2    | Phaedra 2                                  | 0,5 | proteolysis                                  | serine-type endopeptidase activity   |
| 147152_at       | Ser8     |                                            | 0,2 | proteolysis                                  | serine-type endopeptidase activity   |
| 148479_at       | CG18179  |                                            | 0,1 | proteolysis                                  | serine-type endopeptidase activity   |
| 152006_at       | CG10472  |                                            | 0,2 | proteolysis                                  | serine-type endopeptidase activity   |
| 145202_at       | CG9673   |                                            | 0,3 | proteolysis                                  | serine-type endopeptidase activity   |
| 150193_at       | CG3739   |                                            | 0,3 | proteolysis                                  | serine-type endopeptidase activity   |
| 152369_at       | Bace     | beta-site APP-cleaving enzyme              | 0,1 | proteolysis                                  | aspartic-type endopeptidase activity |
| 143243_at       | Mal-A3   | Maltase A3, LvpL                           | 0,1 | carbohydrate metabolic process               | alpha-glucosidase activity           |
| 146808_at       | Mal-A4   | Maltase A4                                 | 0,2 | carbohydrate metabolic process               | alpha-glucosidase activity           |
| 146810_at       | Mal-A8   | Maltase A8                                 | 0,3 | carbohydrate metabolic process               | alpha-glucosidase activity           |
| 146809_at       | Mal-A7   | Maltase A7                                 | 0,4 | carbohydrate metabolic process               | alpha-glucosidase activity           |
| 146050_at       | CG9468   |                                            | 0,0 | mannose metabolic process                    | alpha-mannosidase activity           |
| 150699_at       | CG6295   |                                            | 0,0 | lipid catabolic process                      | lipase activity                      |
| 150702_at       | CG6283   |                                            | 0,4 | lipid catabolic process                      | lipase activity                      |
| 150703_at       | CG6277   |                                            | 0,3 | lipid catabolic process                      | lipase activity                      |
| 147235_at       | CG8093   |                                            | 0,3 | lipid metabolic process                      | triglyceride lipase activity         |
| 147422_at       | CG14500  |                                            | 0,1 | -                                            | C-type lectin                        |
| 148422_at       | CG5804   |                                            | 0,1 | cellular acyl-CoA homeostasis                | fatty-acyl-CoA binding               |
| 150369_at       | Pebp1    | Phosphatidylethanolamine-binding protein 1 | 0,1 | regulation of antimicrobial humoral response | -                                    |
| 152238_at       | Muc68D   | Mucin 68D                                  | 0,5 | chitin metabolic process                     | chitin binding                       |
| 146528_at       | CG10659  |                                            | 0,3 |                                              | N-acetyltransferase activity         |
| 143929_at       | Ag5r2    | Antigen 5-related 2                        | 0,3 | -                                            | -                                    |
| 151781_at       | CG5107   |                                            | 0,2 | -                                            | -                                    |
| 145243_at       | CG8661   |                                            | 0,2 | -                                            | -                                    |
| 152897_at       | CG3868   |                                            | 0,3 | -                                            | -                                    |
| 147407_at       | CG5767   |                                            | 0,3 | -                                            | -                                    |
